# Supplementary material
Source: PubMed Central journal article supplement (PMC9179144)

# THE LANCET

## Rheumatology

### Supplementary appendix

This appendix formed part of the original submission and has been peer reviewed. We post it as supplied by the authors.

Supplement to: MacKenna B, Kennedy NA, Mehrkar A, et al. Risk of severe COVID-19 outcomes associated with immune-mediated inflammatory diseases and immune-modifying therapies: a nationwide cohort study in the OpenSAFELY platform. *Lancet Rheumatol* 2022; published online June 8. [https://doi.org/10.1016/S2665-9913\(22\)00098-4](https://doi.org/10.1016/S2665-9913(22)00098-4).

# Supplementary Material for ‘Risk of severe COVID-19 outcomes associated with immune-mediated inflammatory diseases and immune modifying therapies: a nationwide cohort study in the OpenSAFELY platform’

## Table of Contents

|                                                                                                                                                                                                                                                                                                                                                          |    |
|----------------------------------------------------------------------------------------------------------------------------------------------------------------------------------------------------------------------------------------------------------------------------------------------------------------------------------------------------------|----|
| Text S1. High-cost drugs dataset .....                                                                                                                                                                                                                                                                                                                   | 3  |
| Text S2. Covariates.....                                                                                                                                                                                                                                                                                                                                 | 4  |
| Text S3. Quantitative bias analysis.....                                                                                                                                                                                                                                                                                                                 | 5  |
| Table S1. Sensitivity analyses .....                                                                                                                                                                                                                                                                                                                     | 6  |
| Table S2. Main analysis: Hazard Ratios (HRs) and 95% confidence intervals (CI) for COVID-19-related death, death/critical care admission or hospitalisation, in people with IMIDs compared to the general population.....                                                                                                                                | 8  |
| Table S3. Sensitivity analyses: COVID-19-related death in IMIDs compared to the general population.....                                                                                                                                                                                                                                                  | 9  |
| Table S4. Sensitivity analyses: COVID-19-related critical care admission/death in IMIDs compared to the general population. ....                                                                                                                                                                                                                         | 10 |
| Table S5. Number of individuals with each IMID type receiving standard systemic or any targeted immune modifying therapy.....                                                                                                                                                                                                                            | 11 |
| Table S6. Main analysis: Hazard Ratios (HRs) and 95% confidence intervals (CI) for COVID-19-related death, death/critical care admission or hospitalisation, in people with IMIDs on targeted immune modifying therapies compared to those with IMIDs on standard systemic immune modifying therapies. ....                                              | 12 |
| Table S7. Sensitivity analyses: for COVID-19-related death in people with IMIDs on targeted immune modifying therapies compared to those with IMIDs on standard systemic immune modifying therapies. ....                                                                                                                                                | 14 |
| Table S8. Sensitivity analyses: COVID-19-related critical care admission/death in people with IMIDs on targeted immune modifying therapies compared to those with IMIDs on standard systemic immune modifying therapies.....                                                                                                                             | 15 |
| Table S9. Sensitivity analysis: Hazard Ratios (95% CI) for COVID-19-related death with TNF inhibition monotherapy compared to those receiving combination TNF inhibition and standard systemic therapy.....                                                                                                                                              | 16 |
| Table S10. Descriptive characteristics of population on targeted immunosuppression with infliximab .....                                                                                                                                                                                                                                                 | 17 |
| Table S11. Sensitivity analysis: Hazard Ratios (95% CI) for COVID-19-related death in people with an IMID on infliximab therapy compared to those on standard systemic therapy .....                                                                                                                                                                     | 19 |
| Table S12. Analysis adjusting for age using a four-knot cubic spline: Hazard Ratios (HRs) and 95% confidence intervals (CI) for COVID-19-related death, death/critical care admission or hospitalisation, in people with IMIDs compared to the general population.....                                                                                   | 20 |
| Table S13. Analysis adjusting for age using a four-knot cubic spline: Hazard Ratios (HRs) and 95% confidence intervals (CI) for COVID-19-related death, death/critical care admission or hospitalisation, in people with IMIDs on targeted immune modifying therapies compared to those with IMIDs on standard systemic immune modifying therapies. .... | 21 |
| Table S14. Minimum possible bias-adjusted association between rituximab and COVID-19 death.....                                                                                                                                                                                                                                                          | 22 |
| Table S15. Minimum possible bias-adjusted association between rituximab and COVID-19 critical care admission/death .....                                                                                                                                                                                                                                 | 23 |
| Table S16. Minimum possible bias-adjusted association between rituximab and COVID-19 hospitalisation .....                                                                                                                                                                                                                                               | 24 |
| Table S17. Minimum possible bias-adjusted association between JAK inhibitors and COVID-19 hospitalisation .....                                                                                                                                                                                                                                          | 25 |
| References for the Supplementary Material .....                                                                                                                                                                                                                                                                                                          | 26 |
| Figure S1. Conceptual framework: risk of COVID-19-related death in people with IMIDs compared to the general population .....                                                                                                                                                                                                                            | 27 |
| Figure S2. Conceptual framework: risk of COVID-19-related death in people with IMIDs taking targeted immunosuppressive drugs compared to those prescribed standard systemic drugs.....                                                                                                                                                                   | 28 |
| Figure S3. Age and sex distribution by ethnic group among people with an immune-mediate inflammatory disease within the OpenSafely cohort.....                                                                                                                                                                                                           | 29 |

|                                                                                                                                                                                                        |    |
|--------------------------------------------------------------------------------------------------------------------------------------------------------------------------------------------------------|----|
| Figure S4. Outcomes in people with IMIDs compared to the general population by ethnic group .....                                                                                                      | 30 |
| Figure S5. Minimum associations with unmeasured confounder required to potentially explain observed confounder-adjusted association between rituximab and COVID-19 death .....                         | 34 |
| Figure S6. Minimum associations with unmeasured confounder required to potentially explain observed confounder-adjusted association between rituximab and COVID-19 critical care admission/death ..... | 34 |
| Figure S7. Minimum associations with unmeasured confounder required to potentially explain observed confounder-adjusted association between rituximab and COVID-19 hospitalisation.....                | 35 |
| Figure S8. Minimum associations with unmeasured confounder required to potentially explain observed confounder-adjusted association between JAK inhibitors and COVID-19 hospitalisation.....           | 35 |

### **Text S1. High-cost drugs dataset**

To achieve a comprehensive national medicines dataset, we arranged for the unique collation of a single national hospital medication dataset for “high-cost drugs”. High-cost drugs are typically newer and more expensive medications (e.g., adalimumab) that are supplied by hospitals in England for ongoing disease management. High-cost drugs are paid for by commissioners (in England, National Health Service Clinical Commissioning Groups commission most secondary care services and play a part in the commissioning of GP services) and as part of this process, unique patient identifiers are supplied by hospitals, the responsible commissioner (there are approximately 200 commissioners). The North East Commissioning Support Unit collected high-cost drug data from commissioners and compiled it into a single national dataset (including medication name, date of medication supply and a unique patient identifier – NHS number – allowing linkage with other healthcare data). To our knowledge this is the first time in England that a comprehensive national medicines dataset including high-cost drug data has been available at individual patient level. More information is available in our accompanying short data report.[link will be provided in published paper]

Drug exposure was defined by at least one prescription, or delivery of medication to an individual before March 1<sup>st</sup>, 2020 (date chosen as some medications were either specifically used, or stopped, due to the pandemic). For each individual, we defined drug exposure based on the closest drug recorded prior to the study start (March 1<sup>st</sup> 2020) allowing for a maximum of 6 months before the start of the study for all agents apart from rituximab, where we permitted a 12-month exposure window (to allow for the frequency of treatment and the longer duration of response of rituximab, including known prolonged effects on vaccine responses).<sup>1,2</sup> We could not evaluate medication switching or adherence during the follow-up period, as data was only available up to March 2020.

## **Text S2. Covariates**

All analytical code for all covariates definitions are openly available online for inspection and re-use. Some brief descriptions are provided below.

### *Age*

Age was defined by the age reached by the 1<sup>st</sup> March 2020 (study start date). We categorised age groups as: 18–39, 40–49, 50–59, 60–69, 70–79 and 80+ years.

### *Smoking and body mass index*

We categorised smoking status as current-, former- or never-smokers, based on primary care morbidity coding recorded prior to March 1<sup>st</sup>, 2020. People with missing smoking status were categorised as never smokers.

Body mass index (BMI) was calculated from height and weight measures recorded in primary care, based on weight measurements within the last 10 years (before March 1<sup>st</sup>, 2020), and restricted to records from after age 16 years. BMI was categorised according to World Health Organisation (WHO) BMI classification: no evidence of obesity (BMI < 30); obese class I (BMI 30–34.9); obese class II (BMI 35–39.9); and obese class III (BMI 40+). Individuals with missing BMI data were categorised as having no evidence of obesity (i.e., BMI < 30).

We undertook a sensitivity analysis without re-categorising missing BMI and smoking status data (i.e., complete-case analysis of only those with complete smoking and BMI data). Our approach reflects an awareness that BMI and smoking data are likely to be not missing at random, and has precedent in previous OpenSAFELY analyses.<sup>3,4</sup>

### *Current glucocorticoid use*

We defined current glucocorticoid use based on a primary care prescription of oral prednisolone at any dose in the three months before study start.

### *Diabetes mellitus*

We defined diabetes mellitus based on the most recent glycosylated haemoglobin (HbA1c) measurement recorded in primary care at any time before study start (March 1<sup>st</sup> 2020): controlled diabetes HbA1c < 58mmol/mol; uncontrolled diabetes HbA1c ≥ 58mmol/mol; or diabetes (based on morbidity coded diabetes) with no recorded HbA1c measure.

### *End stage renal failure*

We defined end stage renal failure based on estimated glomerular filtration rate calculated from the most recent serum creatinine result recorded 15 months before study start (March 1<sup>st</sup>, 2020) in primary care data. We only adjusted for end stage renal failure in sensitivity analyses.

### *Ethnicity*

We defined ethnicity based on coding in primary care. We classified ethnicity as: White, Black, South Asian, and mixed or other. We only adjusted for ethnicity in sensitivity analyses due to the large proportion of missing data (**Tables 1 and 2**).

### *Other chronic comorbidities*

We defined cardiovascular disease (chronic heart failure, ischaemic heart disease, and severe valve or congenital heart disease likely to require lifelong follow-up), cancer (excluding non-melanoma skin cancer), and stroke based on any morbidity coding in primary care recorded prior to March 1<sup>st</sup>, 2020 (study start date). We also adjusted for chronic respiratory disease (chronic obstructive pulmonary disease, fibrosing lung disease, bronchiectasis or cystic fibrosis) and chronic liver disease in a sensitivity analysis, again defined based on any morbidity coding in primary care recorded prior to study start.

### **Text S3. Quantitative bias analysis**

#### *Methods*

We considered severity of immune-mediated inflammatory disease and degree of shielding to be potential confounders which are not available in the data. As such we conducted quantitative bias analysis using E-values to assess how strongly associated these unmeasured confounders would need to be with exposure and outcome to potentially fully explain observed non-null associations (i.e., the association adjusted for both measured covariates and the unmeasured confounder would be null).<sup>5</sup> In order to apply these methods to the hazard ratio, rather than the risk ratio, we make the assumption that the outcomes are rare.

#### *Results*

A non-null association was observed between rituximab and COVID-19 death, critical care admission/death, and hospitalisation. For an unmeasured confounder to potentially fully explain the point estimate for the observed confounder-adjusted association the unmeasured confounder would need to be associated with one of exposure or outcome, conditional on measured covariates, by at least risk ratios 2.75, 3.25 and 2.56 for COVID-19 death, critical care admission/death, and hospitalisation respectively (1.46, 1.95, and 1.59 to potentially explain the lower bound of the 95% CI) (**Figures S6-S8, Tables S14-S17**).

Furthermore, to potentially fully explain the point estimate the unmeasured confounder would need to be associated with both exposure and outcome, conditional on measured covariates, by at least risk ratio 1.68, 1.92 and 1.59 for COVID-19 death, critical care admission/death and hospitalisation (1.11, 1.31, and 1.16 to potentially explain the lower bound of the 95% CI).

Additionally, a non-null association was observed between JAK-inhibitors and COVID-19 hospitalisation. To potentially fully explain the confounder-adjusted point estimate (lower bound of 95% CI) the unmeasured confounder would need to be associated with one of exposure or outcome, conditional on measured covariates, by at least risk ratio 3.02 (1.40) and both of exposure and outcome by 1.81 (1.09) (**Figure S9, Table S17**).

#### *Discussion*

An unmeasured confounder moderately associated with both exposure and outcome could potentially explain the associations of rituximab and JAK inhibitors with COVID-19 outcomes. However, whether this is the case in this study and the extent of true residual confounding depends on both the prevalence of and strength of associations with exposure and outcome of the unmeasured confounders, shielding and severity of IMID, which are not known.

**Table S1. Sensitivity analyses**

| <b>Sensitivity analysis</b>                                                                                                                                                                    | <b>Justification</b>                                                                                                                                                                                                                                                                                                                                                                                                                                                                                                                                                                                                                                                                                           |
|------------------------------------------------------------------------------------------------------------------------------------------------------------------------------------------------|----------------------------------------------------------------------------------------------------------------------------------------------------------------------------------------------------------------------------------------------------------------------------------------------------------------------------------------------------------------------------------------------------------------------------------------------------------------------------------------------------------------------------------------------------------------------------------------------------------------------------------------------------------------------------------------------------------------|
| <b>Comparing risk of COVID-19-related death in: 1) people with IMIDs to general population; and 2) people with IMIDs on targeted compared to standard systemic immune modifying therapies.</b> |                                                                                                                                                                                                                                                                                                                                                                                                                                                                                                                                                                                                                                                                                                                |
| Additionally adjusting our confounder-adjusted models for <b>ethnicity</b>                                                                                                                     | We did not adjust for ethnicity in our main analysis due to a large proportion of missing ethnicity data. In this sensitivity analysis, we therefore additionally adjusted confounder adjusted models for ethnicity and restricted our analysis to people with known ethnicity (i.e., complete case analysis). This was done for both of the main study objectives (IMIDs and severe COVID-19 outcomes; and immunosuppressants and severe COVID-19 outcomes).                                                                                                                                                                                                                                                  |
| Additionally adjusting our confounder-adjusted model for <b>chronic respiratory disease, end stage renal failure and chronic liver disease</b>                                                 | We additionally adjusted for further potential confounders (chronic respiratory disease, end stage renal failure and chronic liver disease) to explore: how robust our effect estimates were; and the assumptions underlying the causal diagrams informing our main analyses (i.e., we additionally adjusted for wider sets of confounders, identified in causal diagrams drawn under less restrictive assumptions regarding potential confounding factors). This was done for the objective concerning IMIDs and severe COVID-19 outcomes only, as the confounder adjusted model for the objective concerning immunosuppressants and severe COVID-19 outcomes already included the comorbidities in question. |
| Repeating the main analysis and adjusting for <b>smoking/BMI without missing data reclassification</b>                                                                                         | In our main analyses, individuals with missing BMI measures were categorised as having ‘no evidence of obesity (BMI < 30)’, and those with missing smoking status were categorised as or never-smokers. We therefore undertook a sensitivity analysis restricting to those with known BMI and smoking status (complete case analysis). This was done for both of the main study objectives (IMIDs and severe COVID-19 outcomes; and immunosuppressants and severe COVID-19 outcomes).                                                                                                                                                                                                                          |
| Excluding people with records of <b>haematological malignancy or organ transplants</b>                                                                                                         | While only a small number are likely to have haematological malignancy or organ transplant, there is an established very high risk of COVID-19-related death and adverse outcomes. <sup>6,7</sup>                                                                                                                                                                                                                                                                                                                                                                                                                                                                                                              |
| Adjusting for <b>age</b> using a four-knot cubic <b>spline</b>                                                                                                                                 | In our main analyses we included age as a categorical variable. In a sensitivity analysis, we used four-knot cubic splines to adjust for age in our age and sex adjusted models, and confounder adjusted models, in order to more granularly account for the effect of age.                                                                                                                                                                                                                                                                                                                                                                                                                                    |
| <b>Comparing risk of COVID-19-related critical care admission in people with IMIDs to general population</b>                                                                                   |                                                                                                                                                                                                                                                                                                                                                                                                                                                                                                                                                                                                                                                                                                                |
| Alternative end point of <b>COVID-19-related critical care admission</b>                                                                                                                       | For our main analysis we combined COVID-19-related critical admission and death as one outcome, as not all individuals with severe COVID-19 are admitted to critical care. Combining the outcomes allowed us to capture all individuals with severe COVID-19. However, we explored COVID-19-related critical care admission only as a sensitivity analysis.                                                                                                                                                                                                                                                                                                                                                    |
| <b>Analyses of specific targeted drugs only (compared to standard systemics)</b>                                                                                                               |                                                                                                                                                                                                                                                                                                                                                                                                                                                                                                                                                                                                                                                                                                                |
| Reduced exposure window for <b>TNF inhibition</b> prior to study start compared standard systemic                                                                                              | In our main analyses we assessed exposure to standard and targeted immune modifying drugs within six months of the study start (March 1 <sup>st</sup> , 2020). In a sensitivity analysis for TNF inhibition only, as the most frequently used targeted therapy, we restricted this period to within three months before March 1 <sup>st</sup> , 2020.                                                                                                                                                                                                                                                                                                                                                          |
| TNFi exposure as <b>TNFi monotherapy</b> , compared                                                                                                                                            | In our main analysis, we defined TNFi exposure to include TNFi monotherapy and TNFi combination therapy with standard systemic agents. In a sensitivity                                                                                                                                                                                                                                                                                                                                                                                                                                                                                                                                                        |

|                                                                      |                                                                                                                                                                                                                                                                                                                                                                                                                                                                                                                                                                                                                                                        |
|----------------------------------------------------------------------|--------------------------------------------------------------------------------------------------------------------------------------------------------------------------------------------------------------------------------------------------------------------------------------------------------------------------------------------------------------------------------------------------------------------------------------------------------------------------------------------------------------------------------------------------------------------------------------------------------------------------------------------------------|
| <p>to TNFi combination therapy with standard systemic</p>            | <p>analysis we compared the risk of COVID-19-related death in individuals prescribed TNFi monotherapy against TNFi combination therapy, as differences in infection outcomes have been described in individuals prescribed TNFi monotherapy compared to combination therapy.<sup>8</sup></p>                                                                                                                                                                                                                                                                                                                                                           |
| <p>TNFi exposure defined as <b>infliximab</b> only</p>               | <p>In our main analysis, we defined TNFi exposure including all TNF inhibitor medications. However, with the TNFi class, individuals prescribed infliximab might be systematically different in terms of disease severity (a confounder that is difficult to capture); it was also more likely that they were treated in hospital; and we hypothesised that exposure may be associated with an increased risk of severe COVID-19 outcomes. Therefore, we repeated our main analysis including those on infliximab only.</p>                                                                                                                            |
| <p><b>Rituximab and JAK inhibitor</b> quantitative bias analysis</p> | <p>We considered severity of immune-mediated inflammatory disease and degree of shielding to be potential confounders that are not available in the data. We therefore conducted quantitative bias analysis using E-values to assess how strongly associated these unmeasured confounders would need to be with exposure and outcome to potentially fully explain observed non-null associations (i.e., the association adjusted for both measured covariates and the unmeasured confounder would be null). In order to apply these methods to the hazard ratio to rather than the risk ratio, we made the assumption that the outcomes were rare.</p> |



**Table S2. Main analysis: Hazard Ratios (HRs) and 95% confidence intervals (CI) for COVID-19-related death, death/critical care admission or hospitalisation, in people with IMIDs compared to the general population**

|                                                  | Events | Person-years | Rate per 1000 PY (95%CI) | Crude HR (95%CI)  | Age and sex adjusted HR (95%CI) | Confounder adjusted HR (95%CI) | Mediator adjusted HR (95% CI) |
|--------------------------------------------------|--------|--------------|--------------------------|-------------------|---------------------------------|--------------------------------|-------------------------------|
| <b>COVID-19 death</b>                            |        |              |                          |                   |                                 |                                |                               |
| General population                               | 40,453 | 8,293,798    | 4.88 (4.83, 4.93)        | REF               | REF                             | REF                            | REF                           |
| All IMID                                         | 4,824  | 583,617      | 8.27 (8.03, 8.50)        | 1.70 (1.65, 1.75) | 1.27 (1.23, 1.31)               | 1.23 (1.20, 1.27)              | 1.15 (1.11, 1.18)             |
| Inflammatory joint disease                       | 1,856  | 136,333      | 13.61 (13.00, 14.25)     | 2.75 (2.62, 2.88) | 1.51 (1.44, 1.58)               | 1.47 (1.40, 1.54)              | 1.30 (1.24, 1.37)             |
| Inflammatory skin disease                        | 2,608  | 386,455      | 6.75 (6.49, 7.01)        | 1.34 (1.29, 1.40) | 1.16 (1.11, 1.20)               | 1.12 (1.08, 1.17)              | 1.07 (1.02, 1.11)             |
| Inflammatory bowel disease                       | 721    | 99,875       | 7.22 (6.70, 7.77)        | 1.42 (1.32, 1.53) | 1.15 (1.07, 1.24)               | 1.12 (1.04, 1.21)              | 1.07 (0.99, 1.15)             |
| <b>COVID-19 critical care admission or death</b> |        |              |                          |                   |                                 |                                |                               |
| General population                               | 43,972 | 8,311,564    | 5.29 (5.24, 5.34)        | REF               | REF                             | REF                            | REF                           |
| All IMID                                         | 5,208  | 585,538      | 8.89 (8.65, 9.14)        | 1.68 (1.63, 1.73) | 1.28 (1.24, 1.31)               | 1.24 (1.21, 1.28)              | 1.16 (1.12, 1.19)             |
| Inflammatory joint disease                       | 1,950  | 137,026      | 14.23 (13.61, 14.88)     | 2.64 (2.52, 2.76) | 1.50 (1.43, 1.57)               | 1.46 (1.39, 1.52)              | 1.30 (1.24, 1.36)             |
| Inflammatory skin disease                        | 2,867  | 387,508      | 7.40 (7.13, 7.67)        | 1.36 (1.31, 1.41) | 1.18 (1.13, 1.22)               | 1.15 (1.10, 1.19)              | 1.08 (1.04, 1.13)             |
| Inflammatory bowel disease                       | 784    | 100,186      | 7.83 (7.29, 8.39)        | 1.42 (1.33, 1.53) | 1.16 (1.08, 1.24)               | 1.13 (1.06, 1.22)              | 1.08 (1.01, 1.16)             |
| <b>COVID-19 hospitalisation</b>                  |        |              |                          |                   |                                 |                                |                               |
| General population                               | 72,862 | 8,309,954    | 8.77 (8.70, 8.83)        | REF               | REF                             | REF                            | REF                           |
| All IMID                                         | 8,376  | 585,324      | 14.31 (14.01, 14.62)     | 1.63 (1.60, 1.67) | 1.34 (1.31, 1.37)               | 1.32 (1.29, 1.35)              | 1.20 (1.17, 1.23)             |
| Inflammatory joint disease                       | 2,869  | 136,962      | 20.95 (20.19, 14.62)     | 2.34 (2.26, 2.43) | 1.57 (1.51, 1.63)               | 1.53 (1.47, 1.59)              | 1.32 (1.27, 1.37)             |
| Inflammatory skin disease                        | 4,752  | 387,377      | 12.27 (11.92, 12.62)     | 1.36 (1.33, 1.41) | 1.22 (1.19, 1.26)               | 1.21 (1.17, 1.24)              | 1.10 (1.07, 1.14)             |
| Inflammatory bowel disease                       | 1,426  | 100,146      | 14.24 (13.51, 15.00)     | 1.57 (1.49, 1.65) | 1.35 (1.28, 1.42)               | 1.31 (1.24, 1.38)              | 1.25 (1.19, 1.31)             |

Planned comparisons were made between people with IMIDs, and IMID types (joint, bowel, skin), using the general population as the reference group.

**Confounder adjusted:** age, sex, deprivation, and smoking status

**Mediator adjusted:** age, sex, deprivation, smoking status, BMI, cardiovascular disease, diabetes mellitus and current glucocorticoid use

**Abbreviations:** HR, hazard ratio; CI, confidence interval; PY, person years; IMID, immune mediated inflammatory disease; BMI, body mass index.

**Table S3. Sensitivity analyses: COVID-19-related death in IMIDs compared to the general population.**

|                            | Events | Confounder-adjusted models                             | Additionally adjusting our confounder -adjusted models for ethnicity | Additionally adjusting our confounder -adjusted model for chronic respiratory disease, end stage renal failure and chronic liver disease | Repeating the main analysis and adjusting for smoking/BMI without missing data reclassification | Confounder-adjusted models excluding people with records of haematological malignancy or organ transplants |                   |
|----------------------------|--------|--------------------------------------------------------|----------------------------------------------------------------------|------------------------------------------------------------------------------------------------------------------------------------------|-------------------------------------------------------------------------------------------------|------------------------------------------------------------------------------------------------------------|-------------------|
|                            |        | HR (95% CI)                                            | HR (95% CI)                                                          | HR (95% CI)                                                                                                                              | HR (95% CI)                                                                                     | Events                                                                                                     | HR (95% CI)       |
|                            |        | Total n events: 45,065<br>Total n analysis: 17,527,579 | Total n events: 45,065<br>Total n analysis: 17,527,579               | Total n events: 45,065,<br>Total n analysis: 17,527,579                                                                                  | Total n events: 33,829,<br>Total n analysis: 13,235,476                                         | Total n events: 43,292,<br>Total n analysis: 17,395,123                                                    |                   |
| General population         | 40,453 | REF                                                    | REF                                                                  | REF                                                                                                                                      | REF                                                                                             | 38,841                                                                                                     | REF               |
| All IMID                   | 4,824  | 1.23 (1.20, 1.27)                                      | 1.22 (1.17, 1.26)                                                    | 1.17 (1.14, 1.21)                                                                                                                        | 1.23 (1.19, 1.27)                                                                               | 4,652                                                                                                      | 1.24 (1.20, 1.28) |
| Inflammatory joint disease | 1,856  | 1.47 (1.40, 1.54)                                      | 1.43 (1.36, 1.51)                                                    | 1.37 (1.31, 1.44)                                                                                                                        | 1.46 (1.40, 1.53)                                                                               | 1971                                                                                                       | 1.48 (1.41, 1.55) |
| Inflammatory skin disease  | 2,608  | 1.12 (1.08, 1.17)                                      | 1.12 (1.07, 1.17)                                                    | 1.08 (1.04, 1.12)                                                                                                                        | 1.12 (1.08, 1.16)                                                                               | 2515                                                                                                       | 1.13 (1.08, 1.18) |
| Inflammatory bowel disease | 721    | 1.12 (1.04, 1.21)                                      | 1.11 (1.02, 1.20)                                                    | 1.06 (0.98, 1.14)                                                                                                                        | 1.12 (1.04, 1.21)                                                                               | 690                                                                                                        | 1.12 (1.04, 1.21) |

Planned comparisons were made between people with IMIDs, and IMID subcategories (joint, bowel, skin), using the general population as the reference group.

**Confounder adjusted:** age, sex, deprivation, smoking status. **Abbreviations:** HR, hazard ratio; CI, confidence interval; PY, person years; IMID, immune mediated inflammatory disease; BMI, body mass index.

\* Events counts are different for these analyses due to exclusion of those with missing data on the additionally included variables (complete case analysis).

**Table S4. Sensitivity analyses: COVID-19-related critical care admission/death in IMIDs compared to the general population.**

|                            | COVID-19 death or critical care admission<br>Confounder adjusted analysis |                                | COVID-19 critical care admission alternative outcome<br>Confounder adjusted analysis |                                |
|----------------------------|---------------------------------------------------------------------------|--------------------------------|--------------------------------------------------------------------------------------|--------------------------------|
|                            | Events                                                                    | Confounder Adjusted HR (95%CI) | Events                                                                               | Confounder adjusted HR (95%CI) |
| General population         | 43,972                                                                    | REF                            | 6070                                                                                 | REF                            |
| All IMID                   | 5,208                                                                     | 1.24 (1.21, 1.28)              | 679                                                                                  | 1.36 (1.25, 1.47)              |
| Inflammatory joint disease | 1,950                                                                     | 1.46 (1.39, 1.52)              | 213                                                                                  | 1.59 (1.38, 1.82)              |
| Inflammatory skin disease  | 2,867                                                                     | 1.15 (1.10, 1.19)              | 431                                                                                  | 1.33 (1.21, 1.47)              |
| Inflammatory bowel disease | 784                                                                       | 1.13 (1.06, 1.22)              | 96                                                                                   | 1.05 (0.86, 1.29)              |

Planned comparisons were made between people with IMIDs, and IMID type (joint, bowel, skin), using the general population as the reference group.

**Confounder adjusted:** age, sex, deprivation, and smoking status

**Abbreviations:** HR, hazard ratio; CI, confidence interval; PY, person years; IMID, immune mediated inflammatory disease; BMI, body mass index.

**Table S5. Number of individuals with each IMID type receiving standard systemic or any targeted immune modifying therapy**

|                          | <b>Total</b>   | <b>Standard systemics</b> | <b>Any targeted immune modifying therapy</b> |
|--------------------------|----------------|---------------------------|----------------------------------------------|
|                          | N=200,813      | 181,694 (90.5%)           | 19,119 (9.5%)                                |
| <b>Joint disease</b>     | <b>111,759</b> | <b>98,830 (88.4%)</b>     | <b>12,929 (11.6%)</b>                        |
| Psoriatic arthritis      | 19,698         | 17,162 (87.1%)            | 2,536 (12.9%)                                |
| Rheumatoid arthritis     | 87,581         | 79,154 (90.4%)            | 8,427 (9.6%)                                 |
| Ankylosing spondylitis   | 4,801          | 2,794 (58.2%)             | 2,007 (41.8%)                                |
| <b>Skin disease</b>      | <b>36,967</b>  | <b>31,695 (85.7%)</b>     | <b>5,272 (14.3%)</b>                         |
| Psoriasis                | 34,894         | 30,113 (86.3%)            | 4,781 (13.7%)                                |
| Hidradenitis suppurativa | 2,079          | 1,588 (76.4%)             | 4,91 (23.6%)                                 |
| <b>Bowel disease</b>     | <b>84,333</b>  | <b>79,239 (94.0%)</b>     | <b>5,094 (6.0%)</b>                          |
| Ulcerative Colitis       | 47,784         | 46,435 (97.2%)            | 1,349 (2.8%)                                 |
| Crohn's                  | 26,179         | 22,994 (87.8%)            | 3,185 (12.2%)                                |
| Undifferentiated IBD     | 12,241         | 11,544 (94.3%)            | 697 (5.7%)                                   |

**Table S6. Main analysis: Hazard Ratios (HRs) and 95% confidence intervals (CI) for COVID-19-related death, death/critical care admission or hospitalisation, in people with IMIDs on targeted immune modifying therapies compared to those with IMIDs on standard systemic immune modifying therapies.**

|                                                  | Events     | Person-years | Rate per 1000 PY (95%CI) | Crude HR (95%CI)  | Age/sex adjusted HR (95%CI) | Confounder adjusted HR (95%CI) | Mediator adjusted HR (95%CI) |
|--------------------------------------------------|------------|--------------|--------------------------|-------------------|-----------------------------|--------------------------------|------------------------------|
| <b>COVID-19 death</b>                            |            |              |                          |                   |                             |                                |                              |
| Standard therapy                                 | 987        | 91,113       | 10·83 (10·17, 11·53)     | REF               | REF                         | REF                            | REF                          |
| Targeted therapy                                 | 66         | 9,604        | 6·87 (5·31, 8·74)        | 0·63 (0·49, 0·81) | 1·11 (0·87, 1·43)           | 1·03 (0·80, 1·33)              | 1·01 (0·78, 1·30)            |
| TNF inhibitor                                    | 32         | 6,800        | Redacted††               | 0·43 (0·31, 0·62) | 0·85 (0·60, 1·21)           | 0·84 (0·58, 1·20)              | 0·84 (0·59, 1·20)            |
| IL-12/23 inhibitor                               | Redacted†  | 692          | Redacted†                | 0·53 (0·20, 1·42) | 1·47 (0·55, 3·95)           | 1·61 (0·60, 4·30)              | 1·59 (0·60, 4·23)            |
| IL-17 inhibitor                                  | Redacted†  | 522          | Redacted†                | 0·18 (0·02, 1·25) | 0·46 (0·06, 3·26)           | 0·45 (0·06, 3·21)              | 0·46 (0·06, 3·28)            |
| IL-6 inhibitor                                   | Redacted†  | 380          | Redacted†                | 0·49 (0·12, 1·94) | 0·63 (0·16, 2·52)           | 0·54 (0·14, 2·09)              | 0·48 (0·12, 1·89)            |
| JAK inhibitor                                    | Redacted†  | 437          | Redacted†                | 1·06 (0·44, 2·54) | 1·51 (0·63, 3·63)           | 1·35 (0·56, 3·21)              | 1·22 (0·51, 2·92)            |
| Rituximab                                        | Redacted†† | 998          | Redacted††               | 2·23 (1·49, 3·34) | 2·11 (1·41, 3·16)           | 1·68 (1·11, 2·56)              | 1·59 (1·05, 2·42)            |
| <b>COVID-19 critical care admission or death</b> |            |              |                          |                   |                             |                                |                              |
| Standard therapy                                 | 1070       | 91,411       | 11·71 (11·01, 12·43)     | REF               | REF                         | REF                            | REF                          |
| Targeted therapy                                 | 76         | 9,622        | 7·90 (6·52, 10·3)        | 0·67 (0·53, 0·85) | 1·11 (0·88, 1·40)           | 1·04 (0·82, 1·32)              | 1·02 (0·80, 1·29)            |
| TNF inhibitor                                    | Redacted†† | 6,809        | 5·43 (3·83, 7·49)        | 0·46 (0·33, 0·64) | 0·84 (0·61, 1·17)           | 0·83 (0·59, 1·16)              | 0·83 (0·60, 1·16)            |
| IL-12/23 inhibitor                               | Redacted†  | 694          | Redacted†                | 0·49 (0·18, 1·31) | 1·17 (0·44, 3·15)           | 1·25 (0·47, 3·33)              | 1·23 (0·46, 3·27)            |
| IL-17 inhibitor                                  | Redacted†  | 522          | Redacted†                | 0·16 (0·02, 1·16) | 0·37 (0·05, 2·62)           | 0·35 (0·05, 2·53)              | 0·36 (0·05, 2·58)            |

Severe COVID-19 outcomes in immune-mediated inflammatory diseases: Supplementary Material

|                                 |            |        |                      |                   |                   |                   |                   |
|---------------------------------|------------|--------|----------------------|-------------------|-------------------|-------------------|-------------------|
| IL-6 inhibitor                  | Redacted†  | 382    | Redacted†            | 0·67 (0·22, 2·08) | 0·86 (0·28, 2·66) | 0·75 (0·25, 2·27) | 0·67 (0·22, 2·05) |
| JAK inhibitor                   | Redacted†  | 438    | Redacted†            | 0·97 (0·41, 2·34) | 1·33 (0·55, 3·20) | 1·19 (0·50, 2·83) | 1·09 (0·46, 2·60) |
| Rituximab                       | Redacted†† | 1,002  | 28·94 (19·38, 41·56) | 2·48 (1·71, 3·58) | 2·36 (1·63, 3·41) | 1·92 (1·31, 2·81) | 1·81 (1·24, 2·64) |
| <b>COVID-19 hospitalisation</b> |            |        |                      |                   |                   |                   |                   |
| Standard therapy                | 1787       | 91,360 | 19·56 (18·66, 20·49) | REF               | REF               | REF               | REF               |
| Targeted therapy                | 150        | 9,619  | 15·59 (13·20, 18·30) | 0·80 (0·68, 0·94) | 1·05 (0·89, 1·24) | 0·99 (0·84, 1·17) | 0·98 (0·82, 1·16) |
| TNF inhibitor                   | 77         | 6,808  | 11·31 (8·93, 14·14)  | 0·58 (0·46, 0·73) | 0·80 (0·64, 1·01) | 0·79 (0·63, 1·00) | 0·80 (0·63, 1·00) |
| IL-12/23 inhibitor              | 11         | 694    | 15·85 (7·91, 28·36)  | 0·81 (0·45, 1·46) | 1·29 (0·71, 2·32) | 1·21 (0·67, 2·20) | 1·70 (1·02, 2·82) |
| IL-17 inhibitor                 | 8          | 521    | 15·35 (6·63, 30·24)  | 0·78 (0·39, 1·57) | 1·18 (0·59, 2·37) | 0·98 (0·49, 1·97) | 0·99 (0·49, 2·00) |
| IL-6 inhibitor                  | 6          | 381    | 15·76 (5·78, 34·30)  | 0·81 (0·36, 1·80) | 0·91 (0·41, 2·03) | 0·80 (0·36, 1·79) | 0·74 (0·33, 1·65) |
| JAK inhibitor                   | 15         | 437    | 34·31 (19·20, 56·59) | 1·76 (1·06, 2·91) | 2·04 (1·23, 3·39) | 1·81 (1·09, 3·01) | 1·70 (1·02, 2·82) |
| Rituximab                       | 40         | 1,002  | 39·91 (28·51, 54·35) | 2·04 (1·49, 2·79) | 1·93 (1·41, 2·64) | 1·59 (1·16, 2·18) | 1·51 (1·10, 2·07) |

Planned comparisons were made between people with IMIDs on any targeted immune modifying therapy (and for each group on specific targeted therapies) compared to people with IMIDs on standard systemic therapy as the reference group.

†Cells with counts less than 5 are redacted to protect anonymity.

††Cells which introduce a potential secondary statistical disclosure have been redacted to protect anonymity

**Confounder adjusted:** age, sex, deprivation, smoking status, BMI, specific IMID (inflammatory joint, bowel and skin disease), cardiovascular disease, cancer (excluding non-melanoma skin cancer), stroke, end stage renal failure, chronic liver disease, chronic respiratory disease and diabetes mellitus.

**Mediator adjusted:** age, sex, deprivation, smoking status, BMI, specific IMID (inflammatory joint, bowel and skin disease), cardiovascular disease, cancer (excluding non-melanoma skin cancer), stroke, end stage renal failure, chronic liver disease, chronic respiratory disease, diabetes mellitus and current glucocorticoid use.

**Abbreviations:** HR, hazard ratio; CI, confidence interval; PY, person years; IMID, immune mediated inflammatory disease; BMI, body mass index.

**Table S7. Sensitivity analyses: for COVID-19-related death in people with IMIDs on targeted immune modifying therapies compared to those with IMIDs on standard systemic immune modifying therapies.**

|                    | Events    | Confounder-adjusted models                         | Additionally adjusting our confounder -adjusted models for ethnicity | Repeating the main analysis and adjusting for smoking/BMI without missing data reclassification | Confounder-adjusted models excluding people with records of haematological malignancy or organ transplants |                   | TNF inhibition limited to individuals with a prescription within the 3 months prior to study start compared to standard systemic therapy (prescribed within 3 months of study start).<br>Confounder-adjusted models |                   |
|--------------------|-----------|----------------------------------------------------|----------------------------------------------------------------------|-------------------------------------------------------------------------------------------------|------------------------------------------------------------------------------------------------------------|-------------------|---------------------------------------------------------------------------------------------------------------------------------------------------------------------------------------------------------------------|-------------------|
|                    |           | HR (95% CI)                                        | HR (95% CI)                                                          | HR (95% CI)                                                                                     | Events                                                                                                     | HR (95% CI)       | Events                                                                                                                                                                                                              | HR (95% CI)       |
|                    |           | Total n events: 1,046<br>Total n analysis: 199,248 | Total n events: 1,046<br>Total n analysis: 199,248                   | Total n events: 994<br>Total n analysis: 184,272                                                | Total n events: 1,001<br>Total n analysis: 196,404                                                         |                   | Total n events: 901<br>Total n analysis: 162,949                                                                                                                                                                    |                   |
| Standard therapy   | 987       | REF                                                | REF                                                                  | REF                                                                                             | 951                                                                                                        | REF               | 885                                                                                                                                                                                                                 | REF               |
| Targeted therapy   | 66        | 1.03 (0.80, 1.33)                                  | 1.14 (0.86, 1.52)                                                    | 0.98 (0.75, 1.28)                                                                               | 57                                                                                                         | 0.95 (0.72, 1.25) | N/A                                                                                                                                                                                                                 | N/A               |
| TNF inhibitor      | 32        | 0.84 (0.58, 1.20)                                  | 0.93 (0.62, 1.39)                                                    | 0.77 (0.52, 1.13)                                                                               | Redacted††                                                                                                 | 0.83 (0.58, 1.20) | 22                                                                                                                                                                                                                  | 0.62 (0.40, 0.96) |
| IL-12/23 inhibitor | Redacted† | 1.61 (0.60, 4.30)                                  | 2.22 (0.83, 5.93)                                                    | 1.24 (0.40, 3.82)                                                                               | Redacted†                                                                                                  | 1.69 (0.63, 4.51) | N/A                                                                                                                                                                                                                 | N/A               |
| IL-17 inhibitor    | Redacted† | 0.45 (0.06, 3.21)                                  | 0.58 (0.08, 4.15)                                                    | 0.47 (0.07, 3.36)                                                                               | Redacted†                                                                                                  | 0.48 (0.07, 3.42) | N/A                                                                                                                                                                                                                 | N/A               |
| IL-6 inhibitor     | Redacted† | 0.54 (0.14, 2.09)                                  | 0.68 (0.18, 2.58)                                                    | 0.57 (0.15, 2.20)                                                                               | Redacted†                                                                                                  | 0.29 (0.04, 2.06) | N/A                                                                                                                                                                                                                 | N/A               |
| JAK inhibitor      | Redacted† | 1.35 (0.56, 3.21)                                  | 1.81 (0.76, 4.30)                                                    | 1.41 (0.59, 3.36)                                                                               | Redacted†                                                                                                  | 1.12 (0.42, 2.97) | N/A                                                                                                                                                                                                                 | N/A               |
| Rituximab          | 24        | 1.68 (1.11, 2.56)                                  | 1.72 (1.06, 2.79)                                                    | 1.68 (1.09, 2.57)                                                                               | 18                                                                                                         | 1.54 (0.95, 2.49) | N/A                                                                                                                                                                                                                 | N/A               |

Planned comparisons were made between people with IMIDs on any targeted immune modifying therapy (and for each group on specific targeted therapies) compared to people with IMIDs on standard systemic therapy as the reference group.

† Cells with counts less than 5 are redacted to protect anonymity.

†† Cells which introduce a potential secondary statistical disclosure have been redacted to protect anonymity

**Confounder adjusted:** age, sex, deprivation, smoking status, BMI, specific IMID (inflammatory joint, bowel and skin disease), cardiovascular disease, cancer (excluding non-melanoma skin cancer), stroke, end stage renal failure, chronic liver disease, chronic respiratory disease and diabetes mellitus.

**Abbreviations:** HR, hazard ratio; CI, confidence interval; PY, person years; IMID, immune mediated inflammatory disease; BMI, body mass index.

\* Events counts are different for these analyses due to exclusion of those with missing data on the additionally included variables (complete case analysis).

**Table S8. Sensitivity analyses: COVID-19-related critical care admission/death in people with IMIDs on targeted immune modifying therapies compared to those with IMIDs on standard systemic immune modifying therapies**

|                    | COVID-19 death or critical care admission<br>Confounder adjusted |                        | COVID-19 critical care admission<br>alternative outcome<br>Confounder adjusted |                        |
|--------------------|------------------------------------------------------------------|------------------------|--------------------------------------------------------------------------------|------------------------|
|                    | Events                                                           | Adjusted HR<br>(95%CI) | Events                                                                         | Adjusted HR<br>(95%CI) |
| Standard therapy   | 1070                                                             | REF                    | 172                                                                            | REF                    |
| Targeted therapy   | 76                                                               | 1·04 (0·82, 1·32)      | 17                                                                             | 0·90 (0·54, 1·49)      |
| TNF inhibitor      | Redacted††                                                       | 0·83 (0·59, 1·16)      | 8                                                                              | 0·63 (0·31, 1·30)      |
| IL-12/23 inhibitor | Redacted†                                                        | 1·25 (0·47, 3·33)      | Redacted†                                                                      | 0·91 (0·12, 6·61)      |
| IL-17 inhibitor    | Redacted†                                                        | 0·35 (0·05, 2·53)      | Redacted†                                                                      | 0·83 (0·11, 6·03)      |
| IL-6 inhibitor     | Redacted†                                                        | 0·75 (0·25, 2·27)      | Redacted†                                                                      | 2·44 (0·60, 10·02)     |
| JAK inhibitor      | Redacted†                                                        | 1·19 (0·50, 2·83)      | 0                                                                              | 0                      |
| Rituximab          | Redacted††                                                       | 1·92 (1·31, 2·81)      | 7                                                                              | 2·69 (1·24, 5·85)      |

Planned comparisons were made between people with IMIDs on any targeted immune modifying therapy (and for each group on specific targeted therapies) compared to people with IMIDs on standard systemic therapy as the reference group.

† Cells with counts less than 5 are redacted to protect anonymity.

†† Cells which introduce a potential secondary statistical disclosure have been redacted to protect anonymity

**Confounder adjusted:** age, sex, deprivation, smoking status, BMI, specific IMID (inflammatory joint, bowel and skin disease), cardiovascular disease, cancer (excluding non-melanoma skin cancer), stroke, end stage renal failure, chronic liver disease, chronic respiratory disease and diabetes mellitus.

**Abbreviations:** HR, hazard ratio; CI, confidence interval; PY, person years; IMID, immune mediated inflammatory disease; BMI, body mass index.



**Table S9. Sensitivity analysis: Hazard Ratios (95% CI) for COVID-19-related death with TNF inhibition monotherapy compared to those receiving combination TNF inhibition and standard systemic therapy.**

|                                               | Events | Confounder adjusted HR (95%CI) |
|-----------------------------------------------|--------|--------------------------------|
| TNF and standard systemic combination therapy | 21     | REF                            |
| TNF inhibitor monotherapy                     | 11     | 0·58 (0·26, 1·34)              |

**Confounder adjusted:** age, sex, deprivation, smoking status, BMI, specific IMID (inflammatory joint, bowel and skin disease), cardiovascular disease, cancer (excluding non-melanoma skin cancer), stroke, end stage renal failure, chronic liver disease, chronic respiratory disease and diabetes mellitus

**Abbreviations:** HR, hazard ratio; CI, confidence interval; PY, person years; IMID, immune mediated inflammatory disease; BMI, body mass index.

**Table S10. Descriptive characteristics of population on targeted immunosuppression with infliximab**

|                                      | <b>Standard</b> | <b>TNFi</b>   | <b>Infliximab</b> |
|--------------------------------------|-----------------|---------------|-------------------|
|                                      | N=181,694       | N=13,524      | N=2,112           |
| <b>Age</b>                           |                 |               |                   |
| 18-39                                | 24,898 (13.7%)  | 3,467 (25.6%) | 915 (43.3%)       |
| 40-49                                | 23,140 (12.7%)  | 2,456 (18.2%) | 365 (17.3%)       |
| 50-59                                | 36,588 (20.1%)  | 3,068 (22.7%) | 372 (17.6%)       |
| 60-69                                | 40,134 (22.1%)  | 2,523 (18.7%) | 255 (12.1%)       |
| 70-79                                | 38,842 (21.4%)  | 1,603 (11.9%) | 165 (7.8%)        |
| 80+                                  | 18,092 (10.0%)  | 407 (3.0%)    | 40 (1.9%)         |
| <b>Sex</b>                           |                 |               |                   |
| Male                                 | 76,134 (41.9%)  | 6,259 (46.3%) | 1,052 (49.8%)     |
| <b>BMI</b>                           |                 |               |                   |
| Underweight (<18.5)                  | 3,752 (2.1%)    | 342 (2.5%)    | 93 (4.4%)         |
| Normal (18.5-24.9)                   | 52,050 (28.6%)  | 3,761 (27.8%) | 694 (32.9%)       |
| Overweight (25-29.9)                 | 59,223 (32.5%)  | 3,989 (29.5%) | 568 (26.9%)       |
| Obese I (30-34.9)                    | 32,671 (18.0%)  | 2,334 (17.3%) | 310 (14.7%)       |
| Obese II (35-39.9)                   | 13,370 (7.4%)   | 1,071 (7.9%)  | 123 (5.8%)        |
| Obese III (40+)                      | 7,836 (4.3%)    | 650 (4.8%)    | 68 (3.2%)         |
| Missing                              | 12,792 (7.0%)   | 1,377 (10.2)  | 256 (12.1%)       |
| <b>Index of multiple deprivation</b> |                 |               |                   |
| 1 (least deprived)                   | 39,830 (21.9%)  | 3,104 (23.0%) | 479 (22.7%)       |
| 2                                    | 38,618 (21.3%)  | 2,904 (21.5%) | 431 (20.4%)       |
| 3                                    | 37,626 (20.7%)  | 2,724 (20.1%) | 400 (18.9%)       |
| 4                                    | 34,698 (19.1%)  | 2,473 (18.3%) | 423 (20.0%)       |
| 5 (most deprived)                    | 29,508 (16.2%)  | 2,209 (16.3%) | 354 (16.8%)       |
| Missing                              | 1,414 (0.8%)    | 110 (0.8%)    | 25 (1.2%)         |
| <b>Smoking</b>                       |                 |               |                   |
| Never                                | 68,915 (37.9%)  | 5,214 (38.6%) | 895 (42.4%)       |
| Former                               | 89,418 (49.2%)  | 5,769 (42.7%) | 794 (37.6%)       |
| Current                              | 22,338 (12.3%)  | 2,352 (17.4%) | 338 (16.0%)       |
| Missing                              | 1,023 (0.6%)    | 189 (1.4%)    | 85 (4.0)          |

|                                           | <b>Standard</b> | <b>TNFi</b>   | <b>Infliximab</b> |
|-------------------------------------------|-----------------|---------------|-------------------|
|                                           | N=181,694       | N=13,524      | N=2,112           |
| <b>Comorbidities</b>                      |                 |               |                   |
| <i>Diabetes mellitus</i>                  |                 |               |                   |
| With HbA1c<58mmol/mol                     | 19,572 (10·8%)  | 1,007 (7·4%)  | 121 (5·7%)        |
| With HbA1c≥58mmol/mol                     | 7,863 (4·3%)    | 516 (3·8%)    | 60 (2·8%)         |
| With unknown HbA1c                        | 3,343 (1·8%)    | 245 (1·8%)    | 39 (1·8%)         |
| <i>Cardiovascular disease</i>             | 24,056 (13·2%)  | 1,074 (7·9%)  | 105 (5·0%)        |
| <i>Stroke</i>                             | 7,204 (4·0%)    | 273 (2·0%)    | 26 (1·2%)         |
| <i>Cancer</i>                             | 16,721 (9·2%)   | 487 (3·6%)    | 75 (3·6%)         |
| <b>Glucocorticoids</b>                    |                 |               |                   |
| 1 or more prescriptions in last 3 months* | 20,254 (11·1%)  | 1,292 (9·6%)  | 204 (9·7%)        |
| <b>Ethnicity</b>                          |                 |               |                   |
| White                                     | 130,217 (71·7%) | 9,481 (70·1%) | 1,383 (65·5%)     |
| Asian/Asian British                       | 8,451 (4·7%)    | 671 (5·0%)    | 135 (6·4%)        |
| Black                                     | 1,361 (0·7%)    | 123 (0·9%)    | 20 (0·9%)         |
| Mixed/other                               | 2,183 (1·2%)    | 201 (1·5%)    | 35 (1·7%)         |
| Missing                                   | 39,482 (21·7%)  | 3,048 (22·5%) | 539 (25·5%)       |

All figures are n (%) unless otherwise specified.

Individuals treated with systemic therapy and targeted therapy were included in the targeted therapy cohort.

\*Glucocorticoid use refers to individuals with 1 or more primary care prescriptions for any dose of oral glucocorticoid in the last 3 months prior to the study start date (1<sup>st</sup> March 2020).

**Abbreviations:** TNFi, TNF inhibitors; BMI, Body mass index; HbA1c: glycosylated haemoglobin.

**Table S11. Sensitivity analysis: Hazard Ratios (95% CI) for COVID-19-related death in people with an IMID on infliximab therapy compared to those on standard systemic therapy**

|                                                                           | Events     | Confounder adjusted HR (95%CI) |
|---------------------------------------------------------------------------|------------|--------------------------------|
| <b>Main analysis</b>                                                      |            |                                |
| Standard therapy                                                          | 987        | REF                            |
| TNF inhibitor                                                             | 32         | 0·84 (0·58, 1·20)              |
| <b>Sensitivity analysis with TNFi exposure defined as infliximab only</b> |            |                                |
| Standard therapy                                                          | 987        | REF                            |
| Infliximab                                                                | Redacted # | 1·44 (0·60, 3·48)              |

**Confounder adjusted:** age, sex, deprivation, smoking status, BMI, specific IMID (inflammatory joint, bowel and skin disease), cardiovascular disease, cancer (excluding non-melanoma skin cancer), stroke, end stage renal failure, chronic liver disease, chronic respiratory disease and diabetes mellitus

**Abbreviations:** HR, hazard ratio; CI, confidence interval.

**Table S12. Analysis adjusting for age using a four-knot cubic spline: Hazard Ratios (HRs) and 95% confidence intervals (CI) for COVID-19-related death, death/critical care admission or hospitalisation, in people with IMIDs compared to the general population**

|                                                  | <b>Main analysis:<br/>Age and sex<br/>adjusted HR<br/>(95%CI)</b> | <b>Main analysis:<br/>Confounder<br/>adjusted HR<br/>(95%CI)</b> | <b>Age and sex<br/>adjusted with<br/>spline HR<br/>(95%CI)</b> | <b>Confounder<br/>adjusted HR with<br/>spline<br/>(95%CI)</b> |
|--------------------------------------------------|-------------------------------------------------------------------|------------------------------------------------------------------|----------------------------------------------------------------|---------------------------------------------------------------|
| <b>COVID-19 death</b>                            |                                                                   |                                                                  |                                                                |                                                               |
| General population                               | REF                                                               | REF                                                              | REF                                                            | REF                                                           |
| All IMID                                         | 1.27 (1.23, 1.31)                                                 | 1.23 (1.20, 1.27)                                                | 1.32 (1.28, 1.35)                                              | 1.28 (1.24, 1.32)                                             |
| Inflammatory joint disease                       | 1.51 (1.44, 1.58)                                                 | 1.47 (1.40, 1.54)                                                | 1.58 (1.51, 1.66)                                              | 1.54 (1.47, 1.61)                                             |
| Inflammatory skin disease                        | 1.16 (1.11, 1.20)                                                 | 1.12 (1.08, 1.17)                                                | 1.19 (1.14, 1.24)                                              | 1.16 (1.11, 1.20)                                             |
| Inflammatory bowel disease                       | 1.15 (1.07, 1.24)                                                 | 1.12 (1.04, 1.21)                                                | 1.19 (1.10, 1.28)                                              | 1.16 (1.08, 1.25)                                             |
| <b>COVID-19 critical care admission or death</b> |                                                                   |                                                                  |                                                                |                                                               |
| General population                               | REF                                                               | REF                                                              | REF                                                            | REF                                                           |
| All IMID                                         | 1.28 (1.24, 1.31)                                                 | 1.24 (1.21, 1.28)                                                | 1.31 (1.28, 1.35)                                              | 1.28 (1.24, 1.32)                                             |
| Inflammatory joint disease                       | 1.50 (1.43, 1.57)                                                 | 1.46 (1.39, 1.52)                                                | 1.56 (1.49, 1.63)                                              | 1.51 (1.45, 1.58)                                             |
| Inflammatory skin disease                        | 1.18 (1.13, 1.22)                                                 | 1.15 (1.10, 1.19)                                                | 1.21 (1.16, 1.25)                                              | 1.18 (1.13, 1.22)                                             |
| Inflammatory bowel disease                       | 1.16 (1.08, 1.24)                                                 | 1.13 (1.06, 1.22)                                                | 1.19 (1.11, 1.28)                                              | 1.17 (1.09, 1.25)                                             |
| <b>COVID-19 hospitalisation</b>                  |                                                                   |                                                                  |                                                                |                                                               |
| General population                               | REF                                                               | REF                                                              | REF                                                            | REF                                                           |
| All IMID                                         | 1.34 (1.31, 1.37)                                                 | 1.32 (1.29, 1.35)                                                | 1.34 (1.31, 1.37)                                              | 1.33 (1.30, 1.36)                                             |
| Inflammatory joint disease                       | 1.57 (1.51, 1.63)                                                 | 1.53 (1.47, 1.59)                                                | 1.57 (1.51, 1.63)                                              | 1.53 (1.48, 1.59)                                             |
| Inflammatory skin disease                        | 1.22 (1.19, 1.26)                                                 | 1.21 (1.17, 1.24)                                                | 1.22 (1.19, 1.26)                                              | 1.21 (1.18, 1.25)                                             |
| Inflammatory bowel disease                       | 1.35 (1.28, 1.42)                                                 | 1.31 (1.24, 1.38)                                                | 1.35 (1.28, 1.42)                                              | 1.31 (1.25, 1.38)                                             |

Planned comparisons were made between people with IMIDs, and IMID types (joint, bowel, skin), using the general population as the reference group.

**Confounder adjusted:** age, sex, deprivation, and smoking status

**Abbreviations:** HR, hazard ratio; CI, confidence interval; PY, person years; IMID, immune mediated inflammatory disease; deprivation, index of multiple deprivation.

**Table S13. Analysis adjusting for age using a four-knot cubic spline: Hazard Ratios (HRs) and 95% confidence intervals (CI) for COVID-19-related death, death/critical care admission or hospitalisation, in people with IMIDs on targeted immune modifying therapies compared to those with IMIDs on standard systemic immune modifying therapies.**

|                                                  | <b>Main analysis:<br/>Age and sex<br/>adjusted HR<br/>(95%CI)</b> | <b>Main analysis:<br/>Confounder<br/>adjusted HR<br/>(95%CI)</b> | <b>Using age spline:<br/>Age and sex<br/>adjusted HR<br/>(95%CI)</b> | <b>Using age spline:<br/>Confounder<br/>adjusted HR<br/>(95%CI)</b> |
|--------------------------------------------------|-------------------------------------------------------------------|------------------------------------------------------------------|----------------------------------------------------------------------|---------------------------------------------------------------------|
| <b>COVID-19 death</b>                            |                                                                   |                                                                  |                                                                      |                                                                     |
| Standard therapy                                 | REF                                                               | REF                                                              | REF                                                                  | REF                                                                 |
| Targeted therapy                                 | 1·11 (0·87, 1·43)                                                 | 1·03 (0·80, 1·33)                                                | 1·18 (0·92, 1·52)                                                    | 1·16 (0·90, 1·50)                                                   |
| TNF inhibitor                                    | 0·85 (0·60, 1·21)                                                 | 0·84 (0·58, 1·20)                                                | 0·49 (0·07, 3·48)                                                    | 0·90 (0·63, 1·29)                                                   |
| IL-12/23 inhibitor                               | 1·47 (0·55, 3·95)                                                 | 1·61 (0·60, 4·30)                                                | 1·56 (0·58, 4·18)                                                    | 1·57 (0·59, 4·22)                                                   |
| IL-17 inhibitor                                  | 0·46 (0·06, 3·26)                                                 | 0·45 (0·06, 3·21)                                                | 0·68 (0·17, 2·72)                                                    | 0·50 (0·07, 3·57)                                                   |
| IL-6 inhibitor                                   | 0·63 (0·16, 2·52)                                                 | 0·54 (0·14, 2·09)                                                | 1·34 (0·55, 3·23)                                                    | 0·68 (0·17, 2·68)                                                   |
| JAK inhibitor                                    | 1·51 (0·63, 3·63)                                                 | 1·35 (0·56, 3·21)                                                | 1·54 (0·64, 3·70)                                                    | 1·56 (0·65, 3·74)                                                   |
| Rituximab                                        | 2·11 (1·41, 3·16)                                                 | 1·68 (1·11, 2·56)                                                | 2·24 (1·50, 3·36)                                                    | 2·16 (1·42, 3·26)                                                   |
| <b>COVID-19 critical care admission or death</b> |                                                                   |                                                                  |                                                                      |                                                                     |
| Standard therapy                                 | REF                                                               | REF                                                              | REF                                                                  | REF                                                                 |
| Targeted therapy                                 | 1·11 (0·88, 1·40)                                                 | 1·04 (0·82, 1·32)                                                | 1·17 (0·93, 1·48)                                                    | 1·16 (0·91, 1·47)                                                   |
| TNF inhibitor                                    | 0·84 (0·61, 1·17)                                                 | 0·83 (0·59, 1·16)                                                | 0·89 (0·64, 1·24)                                                    | 0·88 (0·63, 1·23)                                                   |
| IL-12/23 inhibitor                               | 1·17 (0·44, 3·15)                                                 | 1·25 (0·47, 3·33)                                                | 1·23 (0·46, 3·30)                                                    | 1·24 (0·46, 3·33)                                                   |
| IL-17 inhibitor                                  | 0·37 (0·05, 2·62)                                                 | 0·35 (0·05, 2·53)                                                | 0·39 (0·05, 2·75)                                                    | 0·39 (0·06, 2·80)                                                   |
| IL-6 inhibitor                                   | 0·86 (0·28, 2·66)                                                 | 0·75 (0·25, 2·27)                                                | 0·92 (0·30, 2·84)                                                    | 0·92 (0·30, 2·81)                                                   |
| JAK inhibitor                                    | 1·33 (0·55, 3·20)                                                 | 1·19 (0·50, 2·83)                                                | 1·36 (0·57, 3·27)                                                    | 1·38 (0·58, 3·31)                                                   |
| Rituximab                                        | 2·36 (1·63, 3·41)                                                 | 1·92 (1·31, 2·81)                                                | 2·48 (1·72, 3·59)                                                    | 2·40 (1·65, 3·50)                                                   |
| <b>COVID-19 hospitalisation</b>                  |                                                                   |                                                                  |                                                                      |                                                                     |
| Standard therapy                                 | REF                                                               | REF                                                              | REF                                                                  | REF                                                                 |
| Targeted therapy                                 | 1·05 (0·89, 1·24)                                                 | 0·99 (0·84, 1·17)                                                | 1·07 (0·90, 1·26)                                                    | 1·08 (0·92, 1·28)                                                   |
| TNF inhibitor                                    | 0·80 (0·64, 1·01)                                                 | 0·79 (0·63, 1·00)                                                | 0·82 (0·65, 1·03)                                                    | 0·83 (0·66, 1·05)                                                   |
| IL-12/23 inhibitor                               | 1·29 (0·71, 2·32)                                                 | 1·21 (0·67, 2·20)                                                | 1·31 (0·73, 2·37)                                                    | 1·35 (0·75, 2·43)                                                   |
| IL-17 inhibitor                                  | 1·18 (0·59, 2·37)                                                 | 0·98 (0·49, 1·97)                                                | 1·20 (0·60, 2·39)                                                    | 1·23 (0·62, 2·46)                                                   |
| IL-6 inhibitor                                   | 0·91 (0·41, 2·03)                                                 | 0·80 (0·36, 1·79)                                                | 0·93 (0·42, 2·08)                                                    | 0·94 (0·42, 2·08)                                                   |
| JAK inhibitor                                    | 2·04 (1·23, 3·39)                                                 | 1·81 (1·09, 3·01)                                                | 2·05 (1·23, 3·40)                                                    | 2·07 (1·25, 3·44)                                                   |
| Rituximab                                        | 1·93 (1·41, 2·64)                                                 | 1·59 (1·16, 2·18)                                                | 1·94 (1·42, 2·65)                                                    | 1·93 (1·41, 2·64)                                                   |

Planned comparisons were made between people with IMIDs on any targeted immune modifying therapy (and for each group on specific targeted therapies) compared to people with IMIDs on standard systemic therapy as the reference group.

†Cells with counts less than 5 are redacted to protect anonymity.

**Confounder adjusted:** age, sex, deprivation, smoking status, BMI, specific IMID (inflammatory joint, bowel and skin disease), cardiovascular disease, cancer (excluding non-melanoma skin cancer), stroke, end stage renal failure, chronic liver disease, chronic respiratory disease and diabetes mellitus. age, sex, deprivation, smoking status, BMI, specific IMID, chronic cardiovascular disease, cancer (excluding non-melanoma skin cancer), stroke, and diabetes mellitus.

**Abbreviations:** HR, hazard ratio; CI, confidence interval; PY, person years; IMID, immune mediated inflammatory disease; BMI, body mass index.

**Table S14. Minimum possible bias-adjusted association between rituximab and COVID-19 death**

| Risk ratio between exposure and unmeasured confounder | Risk ratio between unmeasured confounder and outcome |                  |                  |                  |                  |
|-------------------------------------------------------|------------------------------------------------------|------------------|------------------|------------------|------------------|
|                                                       | 1·2                                                  | 1·5              | 2                | 3                | 5                |
| 1·2                                                   | 1·63 (1·08-2·49)                                     | 1·59 (1·05-2·42) | 1·54 (1·02-2·35) | 1·49 (0·99-2·28) | 1·46 (0·96-2·22) |
| 1·5                                                   | 1·59 (1·05-2·42)                                     | 1·49 (0·99-2·28) | 1·40 (0·93-2·13) | 1·31 (0·86-1·99) | 1·23 (0·81-1·88) |
| 2                                                     | 1·54 (1·02-2·35)                                     | 1·40 (0·93-2·13) | 1·26 (0·83-1·92) | 1·12 (0·74-1·71) | 1·01 (0·67-1·54) |
| 3                                                     | 1·49 (0·99-2·28)                                     | 1·31 (0·86-1·99) | 1·12 (0·74-1·71) | 0·93 (0·62-1·42) | 0·78 (0·52-1·19) |
| 5                                                     | 1·46 (0·96-2·22)                                     | 1·23 (0·81-1·88) | 1·01 (0·67-1·54) | 0·78 (0·52-1·19) | 0·60 (0·40-0·92) |

**Table S15. Minimum possible bias-adjusted association between rituximab and COVID-19 critical care admission/death**

| Risk ratio between exposure and unmeasured confounder | Risk ratio between unmeasured confounder and outcome |                  |                  |                  |                  |
|-------------------------------------------------------|------------------------------------------------------|------------------|------------------|------------------|------------------|
|                                                       | 1·2                                                  | 1·5              | 2                | 3                | 5                |
| 1·2                                                   | 1·87 (1·27-2·73)                                     | 1·81 (1·24-2·65) | 1·76 (1·20-2·58) | 1·71 (1·16-2·50) | 1·66 (1·14-2·44) |
| 1·5                                                   | 1·81 (1·24-2·65)                                     | 1·71 (1·16-2·50) | 1·60 (1·09-2·34) | 1·49 (1·02-2·19) | 1·41 (0·96-2·06) |
| 2                                                     | 1·76 (1·20-2·58)                                     | 1·60 (1·09-2·34) | 1·44 (0·98-2·11) | 1·28 (0·87-1·87) | 1·15 (0·79-1·69) |
| 3                                                     | 1·71 (1·16-2·50)                                     | 1·49 (1·02-2·19) | 1·28 (0·87-1·87) | 1·07 (0·73-1·56) | 0·90 (0·61-1·31) |
| 5                                                     | 1·66 (1·14-2·44)                                     | 1·41 (0·96-2·06) | 1·15 (0·79-1·69) | 0·90 (0·61-1·31) | 0·69 (0·47-1·01) |



**Table S16. Minimum possible bias-adjusted association between rituximab and COVID-19 hospitalisation**

| Risk ratio between exposure and unmeasured confounder | Risk ratio between unmeasured confounder and outcome |                  |                  |                  |                  |
|-------------------------------------------------------|------------------------------------------------------|------------------|------------------|------------------|------------------|
|                                                       | 1·2                                                  | 1·5              | 2                | 3                | 5                |
| 1·2                                                   | 1·55 (1·13-2·12)                                     | 1·50 (1·10-2·06) | 1·46 (1·06-2·00) | 1·41 (1·03-1·94) | 1·38 (1·01-1·89) |
| 1·5                                                   | 1·50 (1·10-2·06)                                     | 1·41 (1·03-1·94) | 1·32 (0·97-1·82) | 1·24 (0·90-1·70) | 1·17 (0·85-1·60) |
| 2                                                     | 1·46 (1·06-2·00)                                     | 1·32 (0·97-1·82) | 1·19 (0·87-1·64) | 1·06 (0·77-1·45) | 0·95 (0·70-1·31) |
| 3                                                     | 1·41 (1·03-1·94)                                     | 1·24 (0·90-1·70) | 1·06 (0·77-1·45) | 0·88 (0·64-1·21) | 0·74 (0·54-1·02) |
| 5                                                     | 1·38 (1·01-1·89)                                     | 1·17 (0·85-1·60) | 0·95 (0·70-1·31) | 0·74 (0·54-1·02) | 0·57 (0·42-0·78) |

**Table S17. Minimum possible bias-adjusted association between JAK inhibitors and COVID-19 hospitalisation**

| Risk ratio between exposure and unmeasured confounder | Risk ratio between unmeasured confounder and outcome |                  |                  |                  |                  |
|-------------------------------------------------------|------------------------------------------------------|------------------|------------------|------------------|------------------|
|                                                       | 1·2                                                  | 1·5              | 2                | 3                | 5                |
| 1·2                                                   | 1·76 (1·06-2·93)                                     | 1·71 (1·03-2·84) | 1·66 (1·00-2·76) | 1·61 (0·97-2·68) | 1·57 (0·94-2·61) |
| 1·5                                                   | 1·71 (1·03-2·84)                                     | 1·61 (0·97-2·68) | 1·51 (0·91-2·51) | 1·41 (0·85-2·34) | 1·33 (0·80-2·21) |
| 2                                                     | 1·66 (1·00-2·76)                                     | 1·51 (0·91-2·51) | 1·36 (0·82-2·26) | 1·21 (0·73-2·01) | 1·09 (0·65-1·81) |
| 3                                                     | 1·61 (0·97-2·68)                                     | 1·41 (0·85-2·34) | 1·21 (0·73-2·01) | 1·01 (0·61-1·67) | 0·84 (0·51-1·40) |
| 5                                                     | 1·57 (0·94-2·61)                                     | 1·33 (0·80-2·21) | 1·09 (0·65-1·81) | 0·84 (0·51-1·40) | 0·65 (0·39-1·08) |

### References for the Supplementary Material

- 1 Buch MH, Smolen JS, Betteridge N, *et al.* Updated consensus statement on the use of rituximab in patients with rheumatoid arthritis. *Ann Rheum Dis* 2011; **70**: 909–20.
- 2 van Assen S, Holvast A, Benne CA, *et al.* Humoral responses after influenza vaccination are severely reduced in patients with rheumatoid arthritis treated with rituximab. *Arthritis Rheum* 2010; **62**: 75–81.
- 3 Bhaskaran K, Bacon S, Evans SJ, *et al.* Factors associated with deaths due to COVID-19 versus other causes: population-based cohort analysis of UK primary care data and linked national death registrations within the OpenSAFELY platform. *Lancet Reg Heal Eur* 2021; **6**: 100109.
- 4 Bhaskaran K, Rentsch CT, MacKenna B, *et al.* HIV infection and COVID-19 death: a population-based cohort analysis of UK primary care data and linked national death registrations within the OpenSAFELY platform. *Lancet HIV* 2021; **8**: e24–32.
- 5 Ding P, VanderWeele TJ. Sensitivity Analysis Without Assumptions. *Epidemiology* 2016; **27**: 368–77.
- 6 Williamson EJ, Walker AJ, Bhaskaran K, *et al.* Factors associated with COVID-19-related death using OpenSAFELY. *Nature* 2020; **584**: 430–6.
- 7 Cravedi P, Mothi SS, Azzi Y, *et al.* COVID-19 and kidney transplantation: Results from the TANGO International Transplant Consortium. *Am J Transplant* 2020; **20**: 3140–8.
- 8 Akiyama S, Hamdeh S, Micic D, Sakuraba A. Prevalence and clinical outcomes of COVID-19 in patients with autoimmune diseases: a systematic review and meta-analysis. *Ann Rheum Dis* 2021; **80**: 384–91.

**Figure S1. Conceptual framework: risk of COVID-19-related death in people with IMIDs compared to the general population**

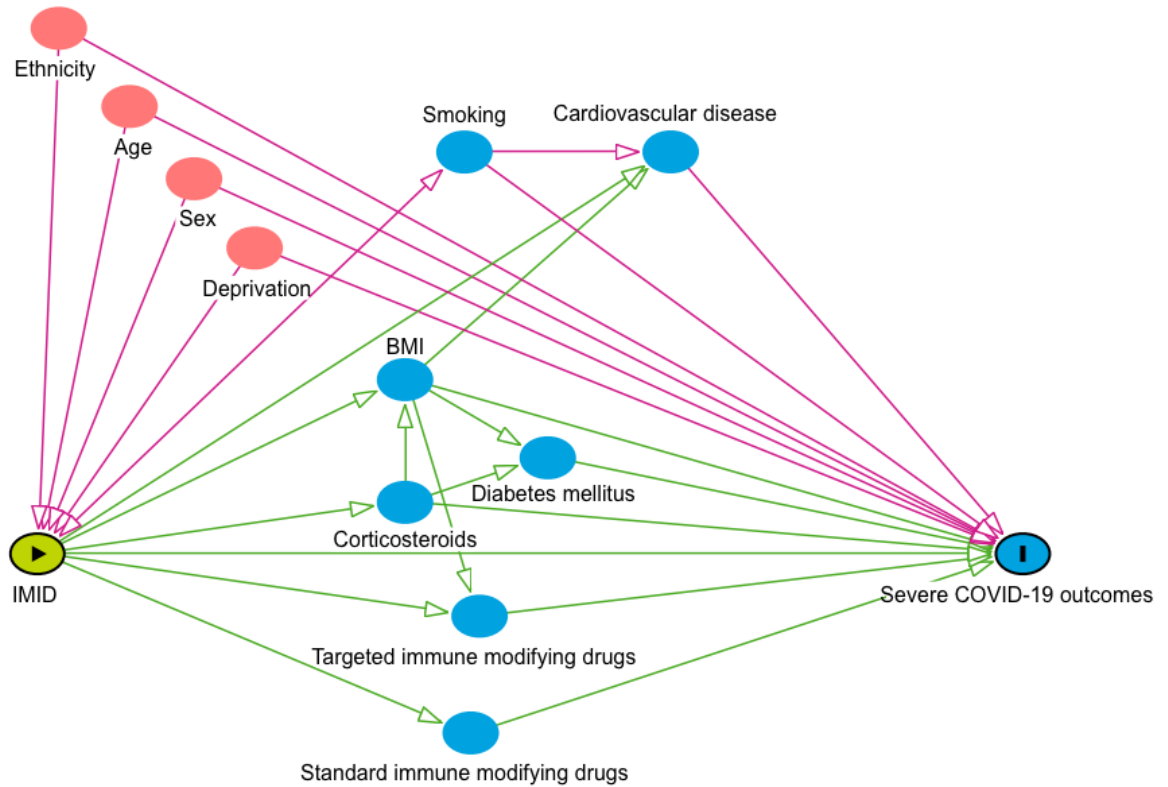

The conceptual framework represents the assumed associations between covariates and primary exposure and outcome. Pink circles represent ancestors of the exposure and outcome, blue circles represent ancestors of the outcome, pink lines represent biasing paths (i.e. confounding) and green lines represent causal paths. The minimally sufficient adjustment set (i.e. the covariates adjusted for in confounder adjusted models) represents covariates such that the adjustment for this set of variables will minimize confounding bias when estimating the association between the exposure and the outcome.

**Figure S2. Conceptual framework: risk of COVID-19-related death in people with IMIDS taking targeted immunosuppressive drugs compared to those prescribed standard systemic drugs.**

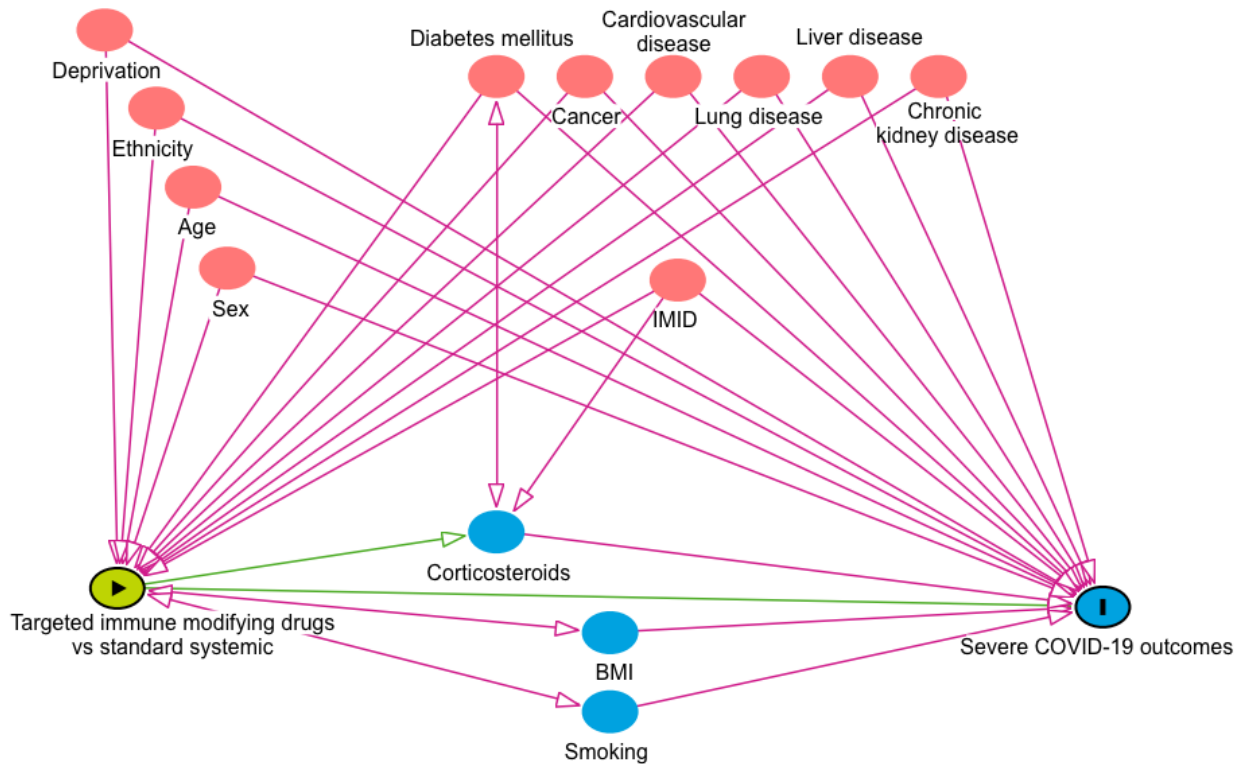

The conceptual framework A directed acyclic graph represents the assumed associations between covariates and primary exposure and outcome. Pink circles represent ancestors of the exposure and outcome, blue circles represent ancestors of the outcome, pink lines represent biasing paths (i.e. confounding) and green lines represent causal paths. The minimally sufficient adjustment set (i.e. the covariates adjusted for in confounder adjusted models) represents covariates such that the adjustment for this set of variables will minimize confounding bias when estimating the association between the exposure and the outcome.

**Figure S3. Age and sex distribution by ethnic group among people with an immune-mediate inflammatory disease within the OpenSafely cohort**

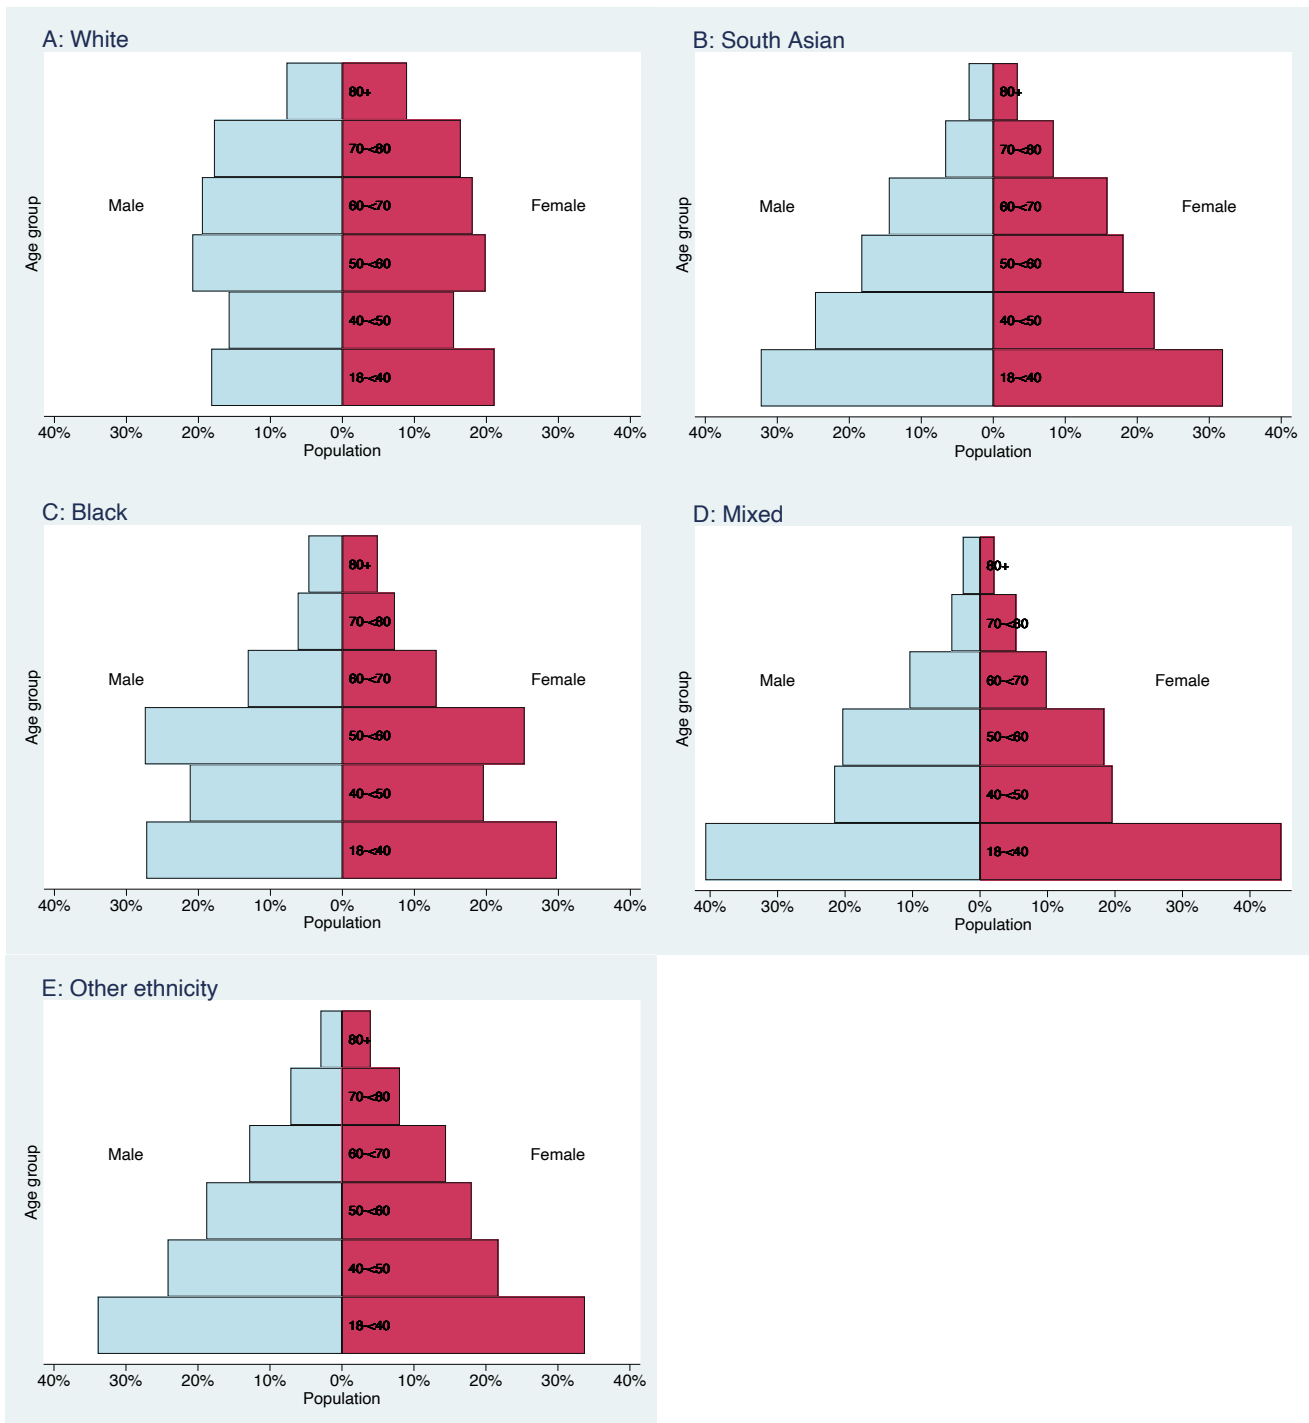

**Figure S4. Outcomes in people with IMIDs compared to the general population by ethnic group**

Comparisons were made within each ethnic group between people with IMIDs, and IMID types (joint, bowel, skin), using the general population as the reference group.

\* Cells with counts less than or equal to 5 are redacted to protect anonymity. Cells which would potentially lead to a secondary risk of statistical disclosure are marked with an asterisk.

**Minimally adjusted:** age and sex

**Confounder adjusted (IMID):** age, sex, deprivation, smoking status

**Mediator adjusted (IMID):** age, sex, deprivation, smoking status, BMI, cardiovascular disease, diabetes, current glucocorticoid use

**Abbreviations:** HR, hazard ratio; CI, confidence interval; PY, person years; IMID, immune mediated inflammatory disease; BMI, body mass index; ICU: intensive care unit (critical care admission).

NB: There was a small variation in the event counts for the IMID subtype analyses (inflammatory joint, bowel and skin disease). The general population event counts shown in this figure are for the all-IMID compared to general population analyses.

Figure S4a. Death from COVID-19

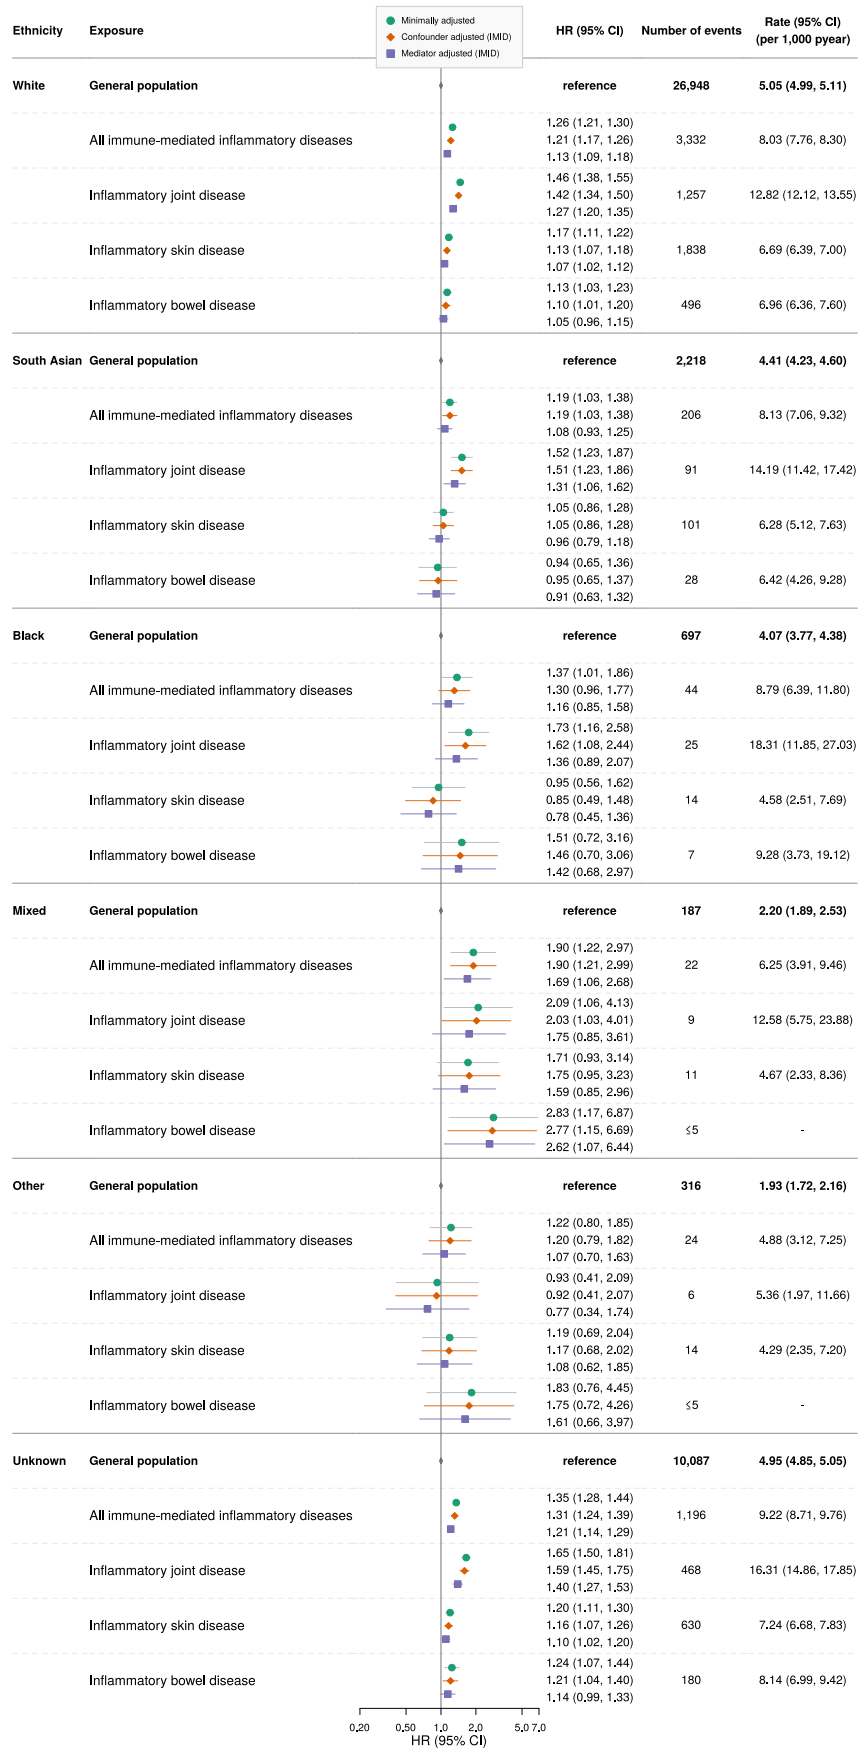



Figure S4b. Critical care admission or death related to COVID-19

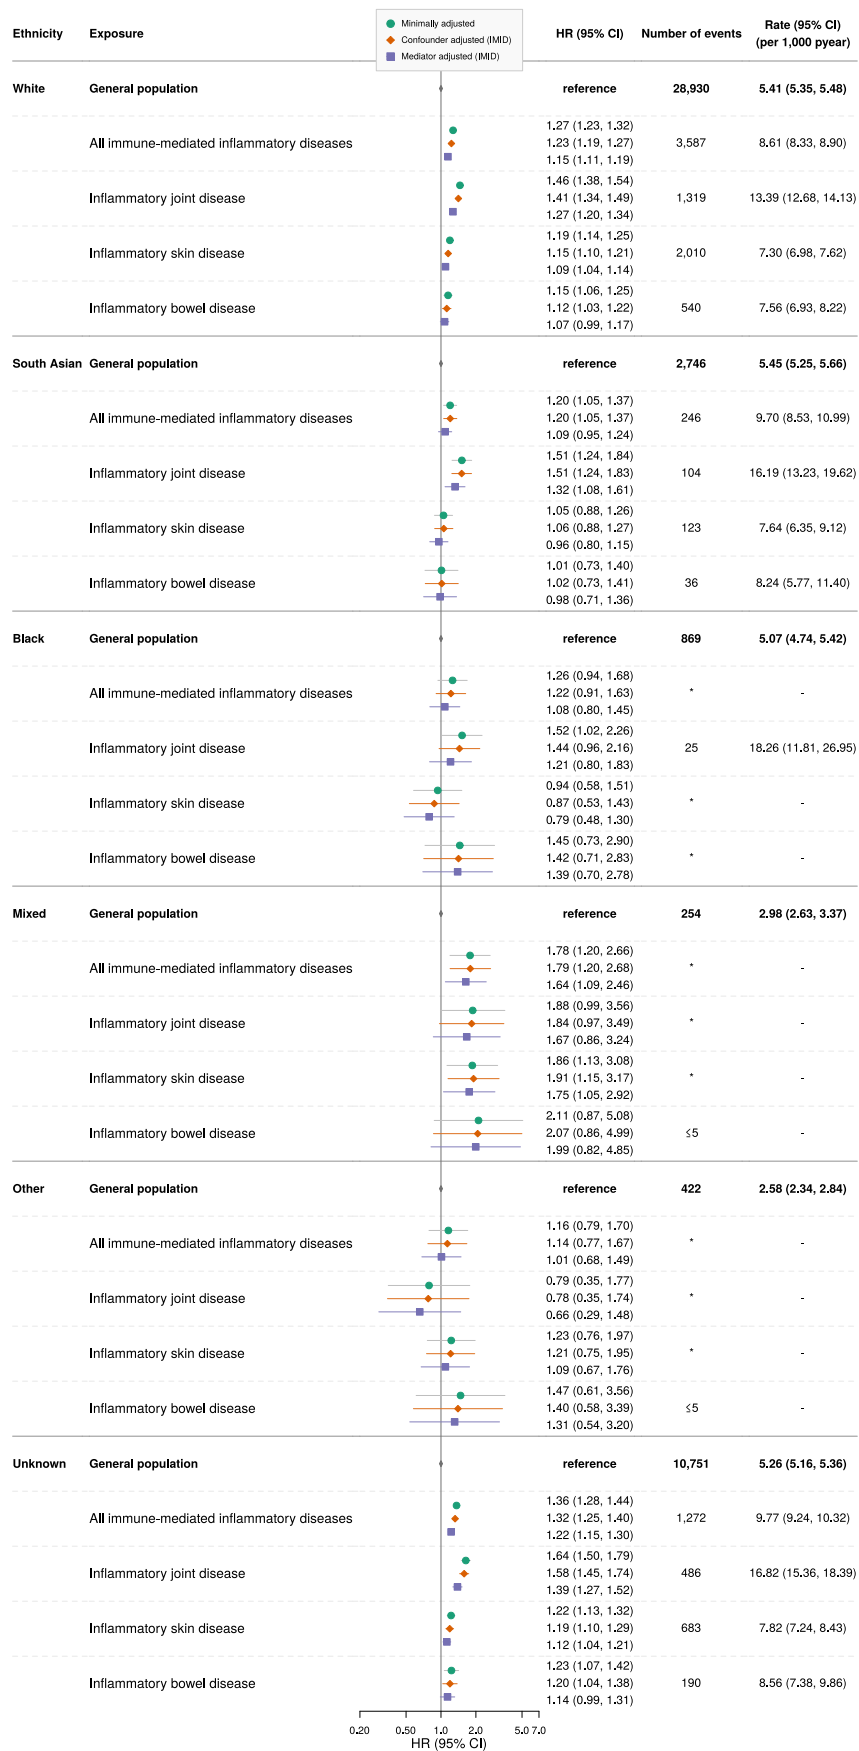

Figure S4c. Hospitalisation for COVID-19

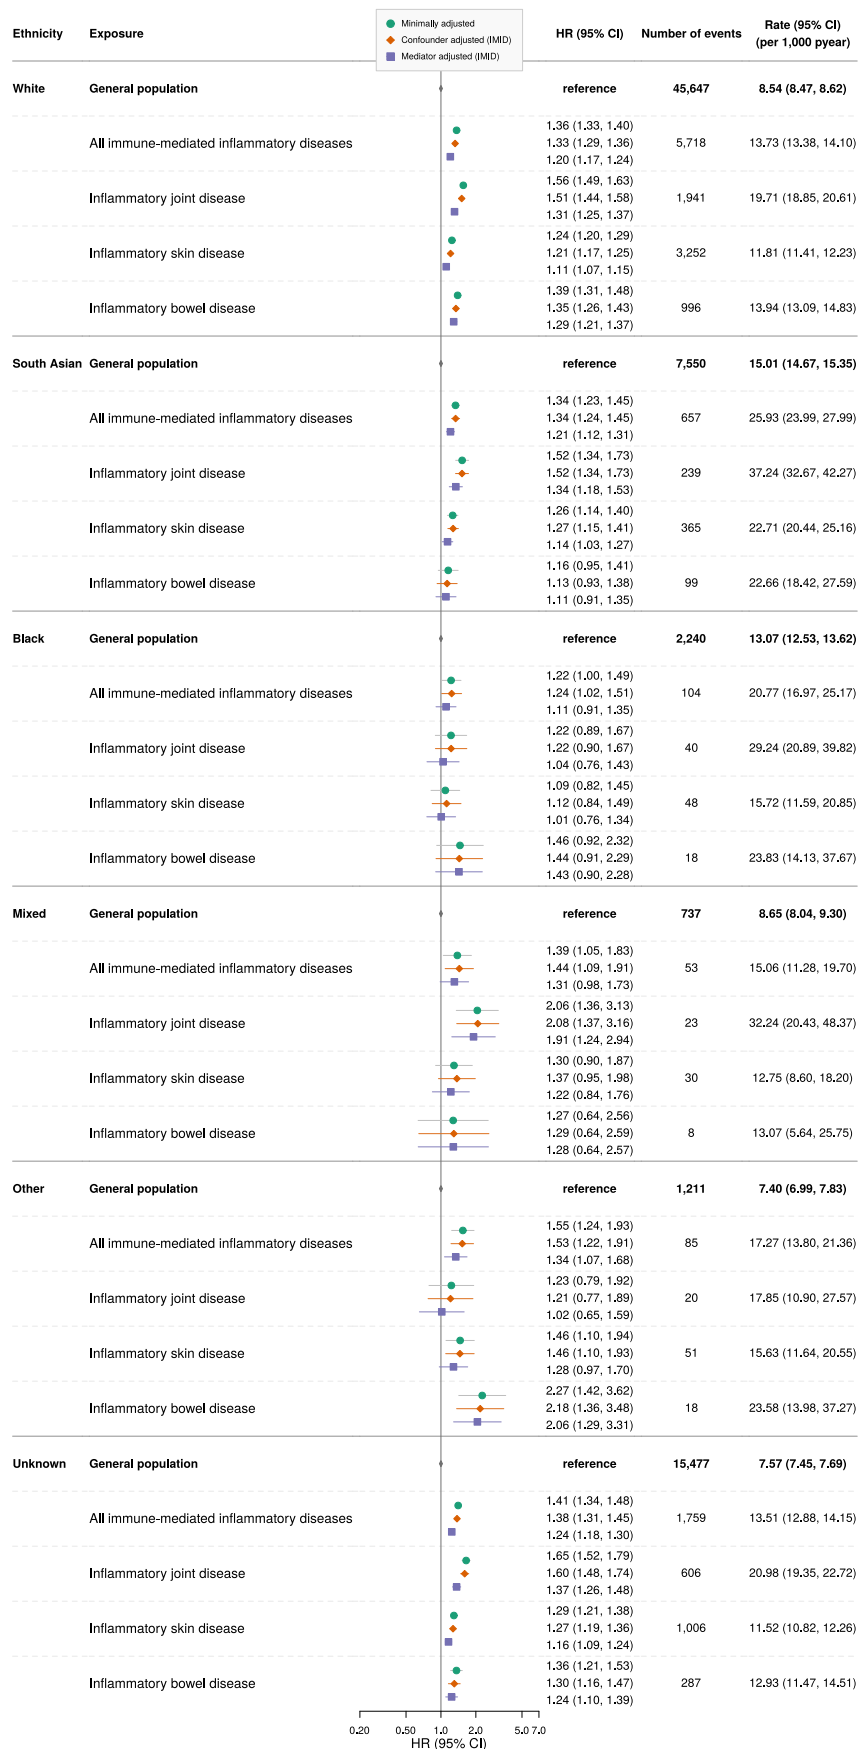

**Figure S5. Minimum associations with unmeasured confounder required to potentially explain observed confounder-adjusted association between rituximab and COVID-19 death**

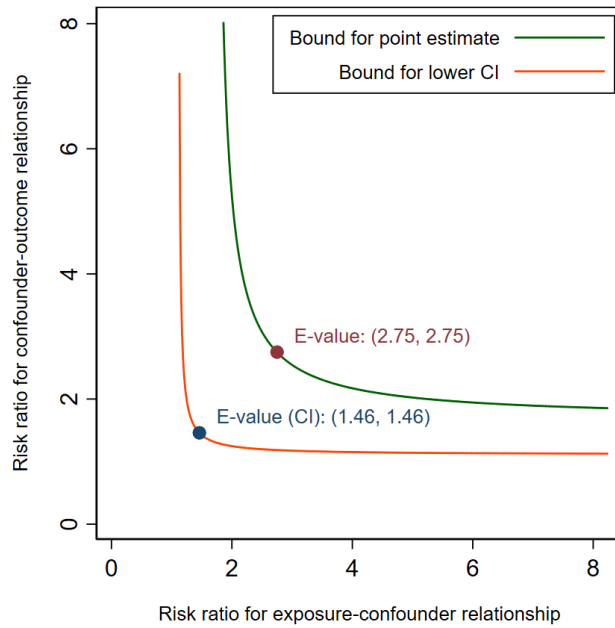

**Figure S6. Minimum associations with unmeasured confounder required to potentially explain observed confounder-adjusted association between rituximab and COVID-19 critical care admission/death**

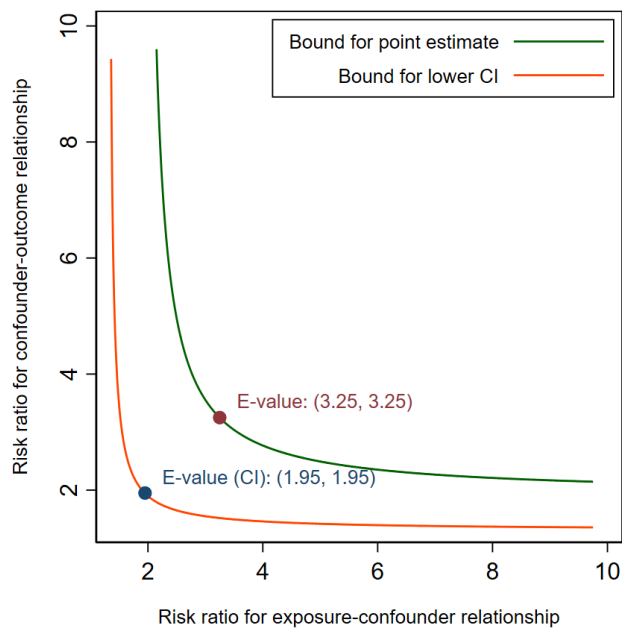

**Figure S7. Minimum associations with unmeasured confounder required to potentially explain observed confounder-adjusted association between rituximab and COVID-19 hospitalisation**

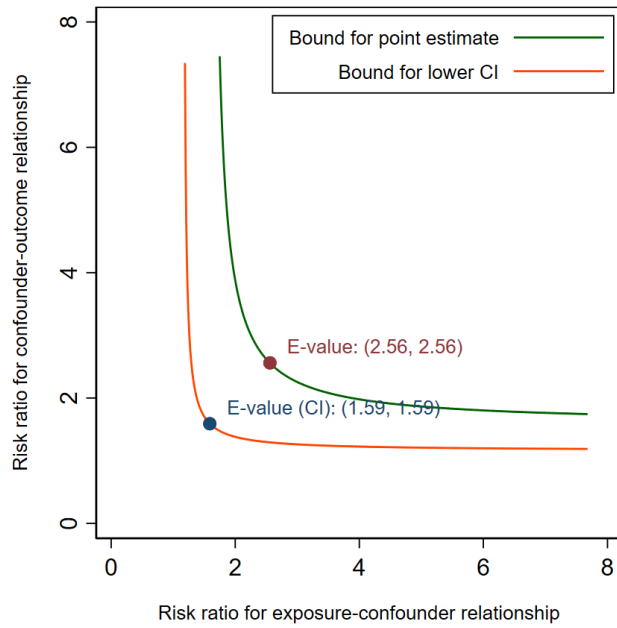

**Figure S8. Minimum associations with unmeasured confounder required to potentially explain observed confounder-adjusted association between JAK inhibitors and COVID-19 hospitalisation**

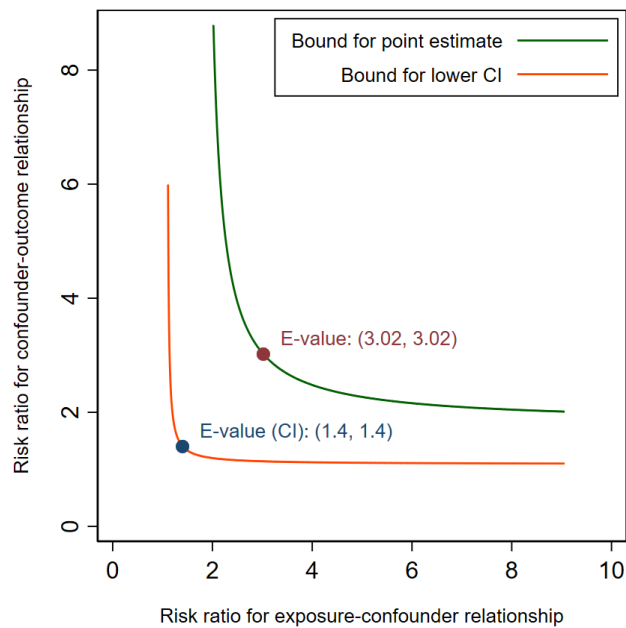

Supplement: mmc1.pdf [file mmc1.pdf]
